# Supplementary material
Source: publisher figshare collection journal article supplement (https://gsapubs.figshare.com/articles/dataset/_/19078037)
Supplement: Supplementary file 1 [file 33907022]

Biao Chang, Junhua Huang, Thomas J. Algeo, Richard D. Pancost, Xiaoqiao Wan, Yunsong Xue, Jianzhong Jia, Zhou Wang, Jun Hu, Jiasheng Wang, Sheng Wang, Jiaqi Wu, and Shucheng Xie, 2022, Episodic massive release of methane during the mid-Cretaceous greenhouse: GSA Bulletin, <https://doi.org/10.1130/B36169.1>.

## Supplemental Material

**Figure S1.** Biostratigraphy and lithostratigraphy of the Qiangdong section, showing the distribution of the nine methane-related carbonate beds (QDS-1 to QDS-9) and outcrop photos.

**Figure S2.** Sample distribution for 2010, 2011, 2013 and 2016 field seasons.

**Figure S3.** Microscale  $\delta^{13}\text{C}_{\text{carb}}$  (‰, VPDB) variation in carbonate concretions.

**Figure S4.** XRD traces of the different carbonate phases (*mm*, *sp*, *b*, *w*).

**Figure S5.** The REE patterns of the different carbonate phases (*mm*, *sp*, *b*, *w*).

**Table S1.** Lithologic and geochemical data of Gambadongshan Formation samples (non-limestone only).

**Table S2.** Lithologic and geochemical data of Gambadongshan Formation samples (9 limestone nodule horizons).

**Table S3.** Rare earth element + yttrium (REE+Y) concentration data of Qiangdong section samples (carbonate phase).

**Table S4.** The isotope data ( $\delta^{13}\text{C}$ ,  $\delta^{18}\text{O}$ ,  $\Delta_{47}$ ) of MDCs.

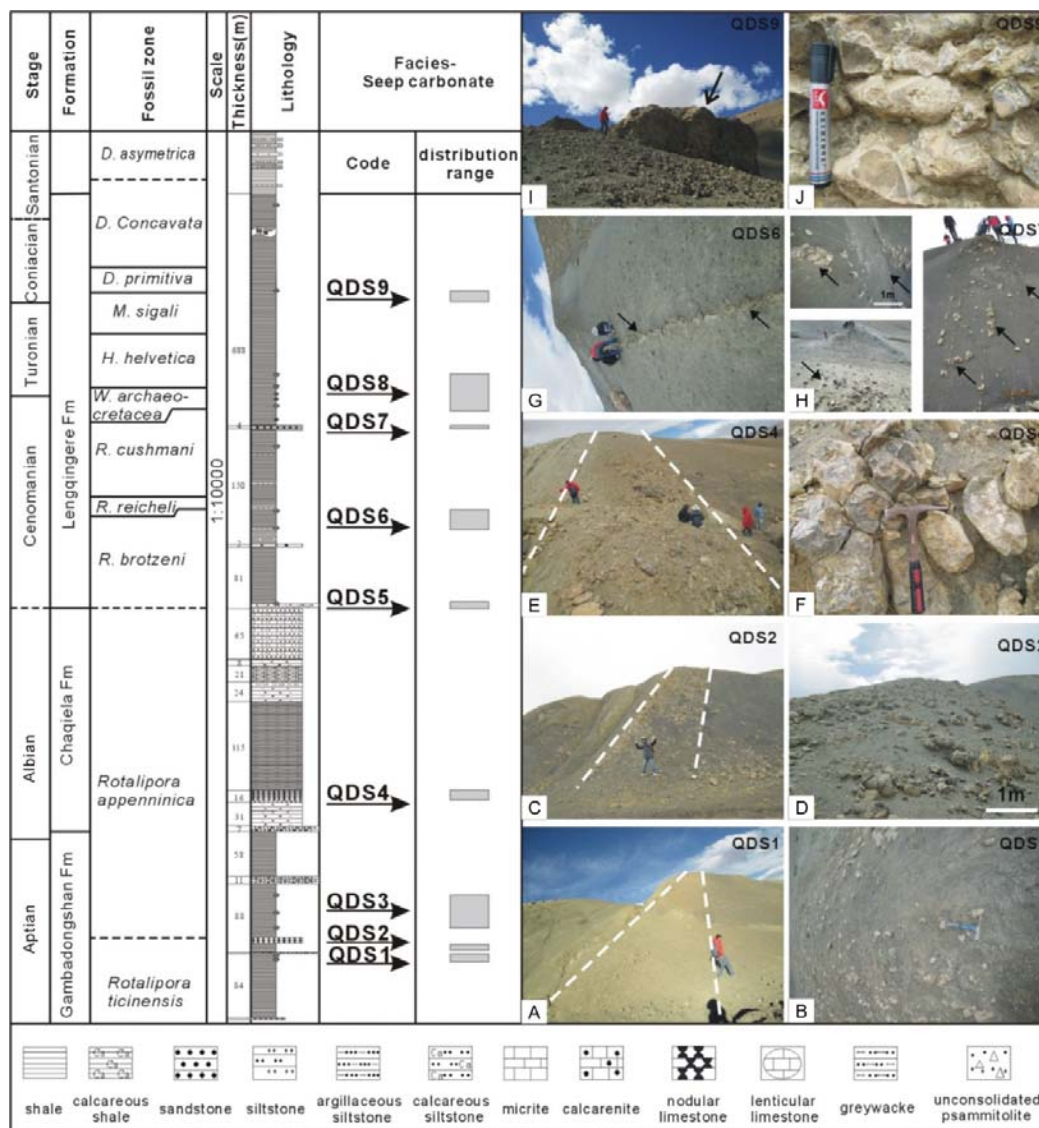

**Fig. S1** Biostratigraphy and lithostratigraphy of the Qiangdong section, showing the distribution of the nine methane-related carbonate beds (QDS-1 to QDS-9) and outcrop photos. Note: in A, C and E, the dashed lines bracket the QDS-1, QDS-2, and QDS-4 horizons, respectively; in G, H and I, the black arrows point to methane-related carbonate nodules.

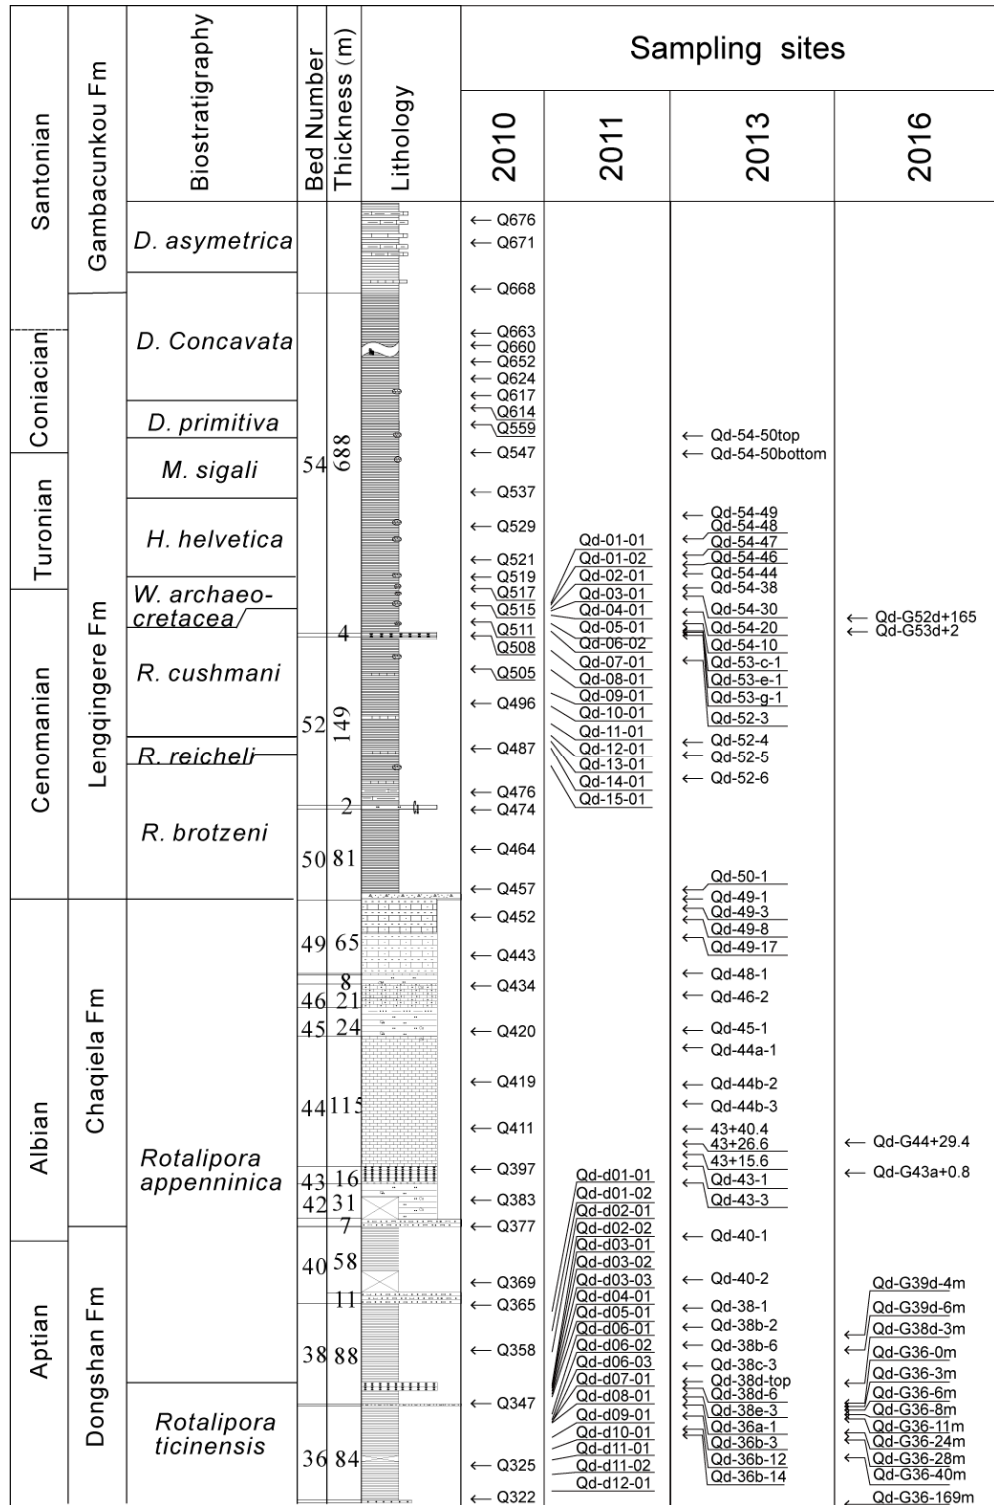

**Fig. S2** Sample distribution for 2010, 2011, 2013 and 2016 field seasons. In 2010, the whole section was sampled with a quasi-uniform distribution; in 2011, sampling focused on the QDS-1, QDS-2 and QDS-7 horizons; in 2013, sampling focused on the QDS-1, QDS-4 and QDS-8 horizons with a few samples from other horizons; and in 2016, sampling focused on the QDS-1, QDS-2, QDS-3, QDS-4 and QDS-7 horizons.

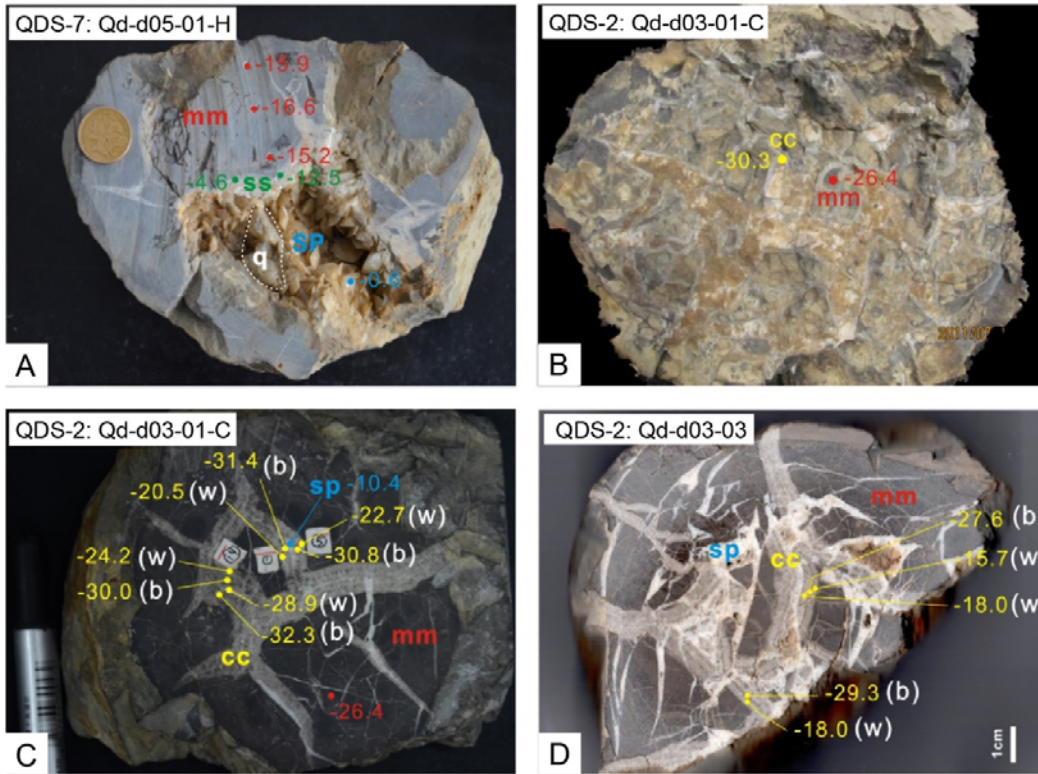

**Fig. S3** Microscale  $\delta^{13}\text{C}_{\text{carb}}$  (‰, VPDB) variation in carbonate concretions. Abbreviations: micrite matrix (*mm*), calcite cements (*cc*) [including clotted calcite (*clot*), botryoidal calcite (*bc*), finely-crystalline sparite (*sp*) with both of small crystals calcite (*ss*) and equant blocky calcite (*bloc*), yellow calcite (*yc*), black calcite (*b*) and white calcite (*w*)] and quartz (*q*).

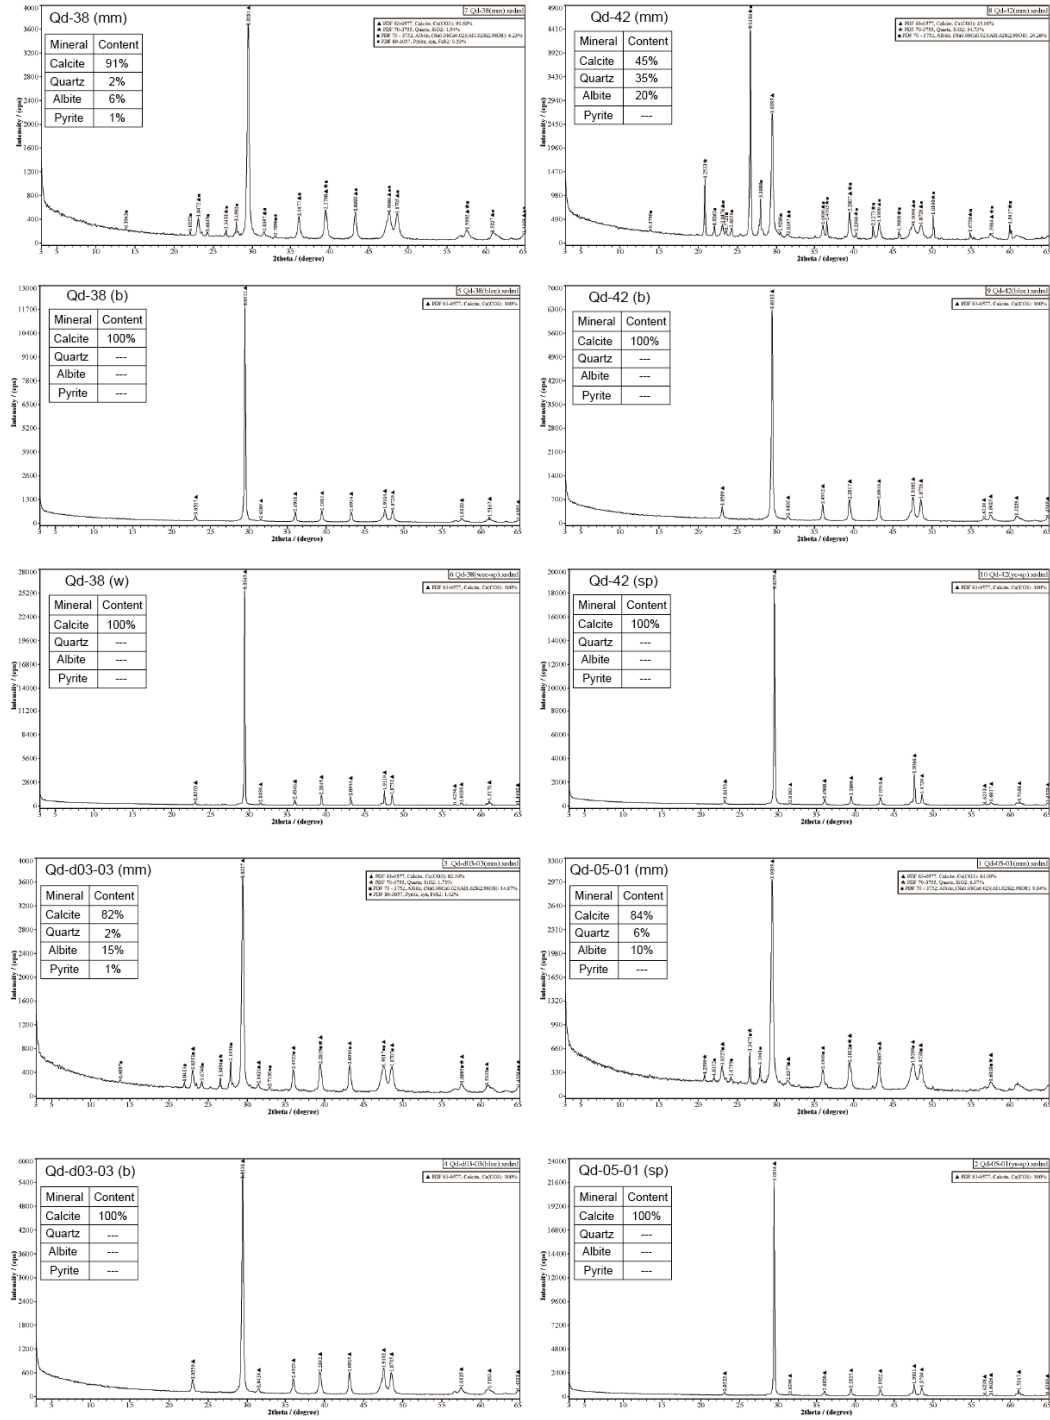

Fig. S4 XRD traces of the different carbonate phases (*mm*, *sp*, *b*, *w*). The *mm* of limestone is mainly composed of calcite, quartz, albite and pyrite, and the *sp*, *b* as well as *w* are almost pure calcite.



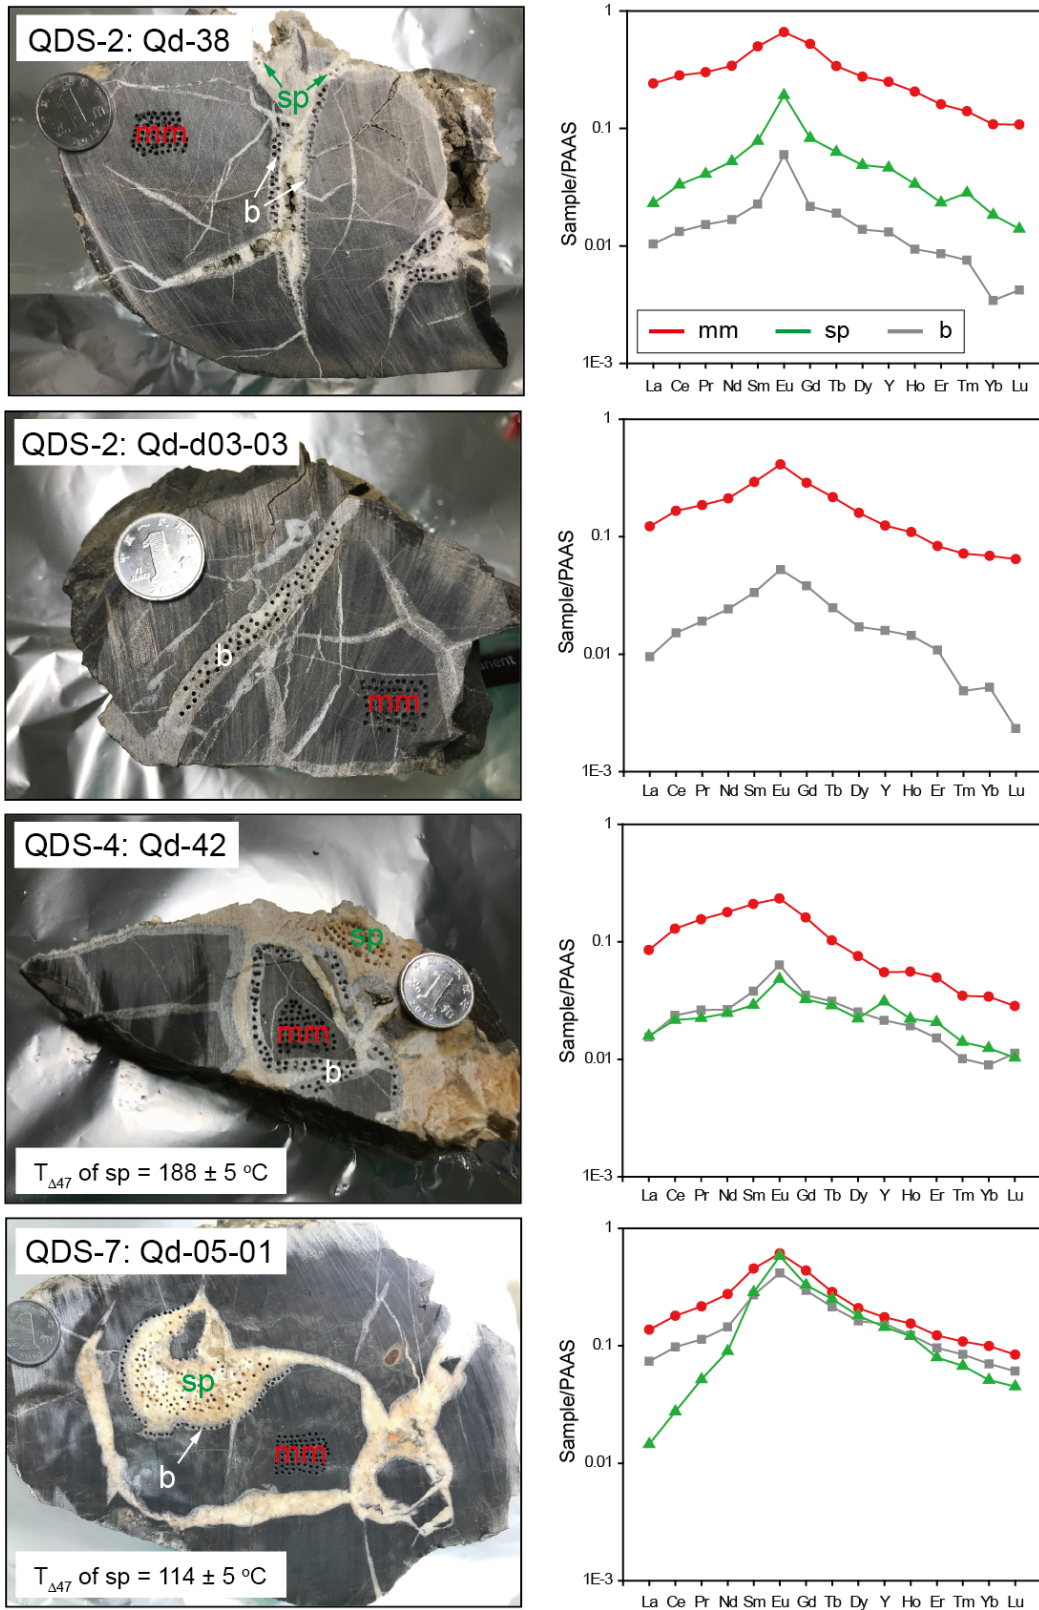

Fig. S5 The REE patterns of the different carbonate phases (*mm*, *sp*, *b*, *w*).

**Table S1. Lithologic and geochemical data of Gambadongshan Formation samples (non-limestone only)**

| <b>Sample No.</b> | <b>Lithology</b>                   | <b>Depth<br/>(m)</b> | <b><math>\delta^{13}\text{C}_{\text{carb}}</math><br/>(VPDB, ‰)</b> | <b><math>\delta^{18}\text{O}_{\text{carb}}</math><br/>(VPDB, ‰)</b> | <b><math>\delta^{13}\text{C}_{\text{org}}</math><br/>(VPDB, ‰)</b> | <b>TOC<br/>(%)</b> | <b>TIC<br/>(%)</b> |
|-------------------|------------------------------------|----------------------|---------------------------------------------------------------------|---------------------------------------------------------------------|--------------------------------------------------------------------|--------------------|--------------------|
| Q559              | calcareous mudstone                | 931.4                | 0.73                                                                | -9.13                                                               | -25.31                                                             |                    |                    |
| Q558              | calcareous mudstone                | 927.8                | 0.63                                                                | -10.02                                                              | -25.21                                                             |                    |                    |
| Q557              | calcareous mudstone                | 923.8                | 0.77                                                                | -8.79                                                               | -25.60                                                             |                    |                    |
| Q555              | calcareous mudstone                | 917.4                | 1.00                                                                | -8.42                                                               |                                                                    |                    |                    |
| Q555              | calcareous mudstone                | 917.4                | 1.00                                                                | -8.42                                                               | -25.21                                                             |                    |                    |
| Q554              | calcareous mudstone                | 913.8                | 0.90                                                                | -8.43                                                               | -25.03                                                             |                    |                    |
| Q553              | calcareous mudstone                | 910.2                | 0.85                                                                | -9.23                                                               | -24.39                                                             |                    |                    |
| Q552              | calcareous mudstone                | 907.0                | 0.62                                                                | -9.64                                                               |                                                                    |                    |                    |
| Q546              | calcareous mudstone                | 891.0                | 0.67                                                                | -9.96                                                               | -25.19                                                             |                    |                    |
| Q544              | calcareous mudstone                | 883.4                | 0.69                                                                | -12.52                                                              | -25.03                                                             |                    |                    |
| Q542              | calcareous mudstone                | 875.8                | 0.04                                                                | -14.47                                                              | -24.97                                                             |                    |                    |
| Qd-54-49          | calcareous mudstone                | 839.0                | 0.90                                                                | -9.83                                                               | -25.23                                                             | 0.26               | 35.3               |
| Qd-54-48          | black and grey calcareous mudstone | 824.0                | 0.59                                                                | -9.37                                                               | -25.04                                                             | 0.36               | 43.0               |
| Qd-54-47          | black and grey calcareous mudstone | 814.0                | 0.66                                                                | -10.01                                                              | -24.95                                                             | 0.39               | 37.2               |
| Qd-54-46          | black and grey calcareous mudstone | 808.0                | 0.58                                                                | -9.24                                                               | -24.84                                                             | 0.56               | 36.7               |
| Qd-54-45          | black and grey calcareous mudstone | 804.0                | 0.16                                                                | -9.50                                                               | -24.98                                                             |                    |                    |
| Qd-54-44          | black and grey calcareous mudstone | 802.0                | -0.55                                                               | -9.86                                                               | -29.37                                                             | 0.11               | 81.1               |
| Qd-54-43          | black and grey calcareous mudstone | 800.0                | 0.46                                                                | -9.75                                                               | -24.92                                                             |                    |                    |
| Qd-54-42          | black and grey calcareous mudstone | 798.5                | 0.66                                                                | -9.24                                                               | -24.83                                                             | 0.41               | 89.6               |
| Qd-54-41          | black and grey calcareous mudstone | 797.0                | 0.53                                                                | -9.65                                                               | -24.78                                                             |                    |                    |
| Qd-54-40          | black and grey calcareous mudstone | 795.0                | 0.56                                                                | -9.53                                                               | -24.87                                                             | 0.41               | 35.5               |

|                 |                                    |       |       |        |        |      |      |
|-----------------|------------------------------------|-------|-------|--------|--------|------|------|
| <b>Qd-54-39</b> | black and grey calcareous mudstone | 794.0 | 0.64  | -9.45  | -24.85 | 0.43 | 34.9 |
| <b>Qd-54-38</b> | black and grey calcareous mudstone | 793.0 | 1.30  | -9.78  | -26.66 | 0.38 | 30.5 |
| <b>Qd-54-37</b> | black and grey calcareous mudstone | 792.0 | 0.74  | -10.28 | -24.85 | 0.38 | 37.2 |
| <b>Q517</b>     | black and grey calcareous mudstone | 789.4 | 0.70  | -9.70  | -24.98 |      |      |
| <b>Qd-54-32</b> | black and grey calcareous mudstone | 789.0 | 0.93  | -9.93  | -24.91 | 0.42 | 34.1 |
| <b>Qd-54-31</b> | black and grey calcareous mudstone | 788.0 | 0.80  | -10.28 | -24.81 |      |      |
| <b>Qd-54-30</b> | black and grey calcareous mudstone | 787.0 | 0.63  | -9.75  | -24.77 | 0.43 | 31.7 |
| <b>Qd-54-29</b> | black and grey calcareous mudstone | 786.0 | 0.59  | -9.85  | -24.86 | 0.42 | 33.8 |
| <b>Qd-54-28</b> | black and grey calcareous mudstone | 785.0 | 0.66  | -10.19 | -24.92 |      |      |
| <b>Qd-54-27</b> | black and grey calcareous mudstone | 784.0 | -0.01 | -9.80  | -24.83 | 0.41 | 35.4 |
| <b>Qd-54-26</b> | black and grey calcareous mudstone | 783.0 | 0.30  | -9.79  | -24.80 | 0.03 | 93.2 |
| <b>Qd-54-25</b> | black and grey calcareous mudstone | 782.0 | 0.65  | -9.82  | -24.79 |      |      |
| <b>Qd-54-24</b> | black and grey calcareous mudstone | 781.0 | 0.40  | -9.83  | -24.69 |      |      |
| <b>Qd-54-23</b> | black and grey calcareous mudstone | 780.0 | 0.26  | -9.99  | -24.74 | 0.36 | 38.9 |
| <b>Qd-54-22</b> | black and grey calcareous mudstone | 779.0 | 0.65  | -9.77  | -24.71 |      |      |
| <b>Qd-54-21</b> | black and grey calcareous mudstone | 777.5 | 0.52  | -9.76  | -24.62 | 0.37 | 38.7 |
| <b>Q515</b>     | black and grey calcareous mudstone | 776.6 | 0.84  | -8.82  | -24.24 |      |      |
| <b>Qd-54-20</b> | calcareous mudstone                | 776.5 | 0.28  | -9.89  | -24.65 |      |      |
| <b>Qd-54-19</b> | calcareous mudstone                | 775.5 | 0.69  | -9.65  | -24.33 |      |      |
| <b>Qd-54-18</b> | calcareous mudstone                | 774.5 | 0.59  | -9.60  | -24.38 | 0.35 | 43.6 |
| <b>Qd-54-17</b> | calcareous mudstone                | 773.5 | 0.90  | -9.70  | -24.32 |      |      |
| <b>Qd-54-16</b> | calcareous mudstone                | 772.5 | 0.66  | -9.67  | -24.43 |      |      |
| <b>Qd-54-15</b> | calcareous mudstone                | 772.0 | 0.72  | -9.77  | -24.53 |      |      |
| <b>Qd-54-14</b> | calcareous mudstone                | 771.5 | 0.83  | -9.66  | -24.48 | 0.45 | 35.2 |
| <b>Qd-54-13</b> | calcareous mudstone                | 771.0 | 0.91  | -9.55  | -24.52 |      |      |
| <b>Qd-54-12</b> | calcareous mudstone                | 770.5 | 1.26  | -9.42  | -24.31 |      |      |



|                   |                     |        |       |        |        |      |      |
|-------------------|---------------------|--------|-------|--------|--------|------|------|
| <b>Qd-54-11</b>   | calcareous mudstone | 770.0  | 1.00  | -9.44  | -24.48 |      |      |
| <b>Qd-54-10</b>   | calcareous mudstone | 769.5  | 1.25  | -9.27  | -24.44 |      |      |
| <b>Qd-54-9</b>    | calcareous mudstone | 769.0  | 0.72  | -9.37  | -24.46 |      |      |
| <b>Qd-54-8</b>    | calcareous mudstone | 768.5  | 0.66  | -9.57  | -24.44 |      |      |
| <b>Qd-54-7</b>    | calcareous mudstone | 768.0  | 0.65  | -9.50  | -24.39 |      |      |
| <b>Qd-54-6</b>    | calcareous mudstone | 767.5  | 0.82  | -9.47  | -24.38 |      |      |
| <b>Qd-54-5</b>    | calcareous mudstone | 767.0  | 0.89  | -9.44  | -24.11 |      |      |
| <b>Qd-54-3</b>    | calcareous mudstone | 766.5  | -0.58 | -9.94  | -24.81 |      |      |
| <b>Qd-54-2</b>    | calcareous mudstone | 766.0  | -0.82 | -10.07 | -24.90 | 0.32 | 34.0 |
| <b>Qd-54-1</b>    | calcareous mudstone | 765.5  | 0.02  | -9.99  | -24.94 |      |      |
| <b>Qd-53-a-3</b>  | calcareous mudstone | 764.0  | 0.91  | -9.90  | -24.83 | 0.31 | 35.9 |
| <b>Qd-53-b-1</b>  | calcareous mudstone | 763.15 | 0.31  | -9.68  | -24.21 | 0.30 | 35.9 |
| <b>Qd-53-d-1</b>  | calcareous mudstone | 762.15 | -2.69 | -9.57  | -24.80 |      |      |
| <b>Qd-04-01</b>   | calcareous mudstone | 762.0  | -0.05 | -9.44  | -25.02 | 0.35 | 37.7 |
| <b>Qd-53-f-1</b>  | calcareous mudstone | 761.65 | -1.55 | -9.67  | -24.88 | 0.34 | 41.1 |
| <b>Qd-06-01A</b>  | calcareous mudstone | 761.0  | -0.42 | -8.80  |        |      |      |
| <b>Qd-02-01</b>   | calcareous mudstone | 760.5  | 0.67  | -9.04  | -24.27 | 0.35 | 40.0 |
| <b>Qd-01-02</b>   | calcareous mudstone | 759.0  | 0.98  | -9.20  | -24.32 |      |      |
| <b>Qd-07-01-2</b> | calcareous mudstone | 757.8  | 0.46  | -10.20 | -24.94 |      |      |
| <b>Qd-07-01-1</b> | calcareous mudstone | 757.8  | 0.24  | -9.43  | -24.83 | 0.29 | 46.0 |
| <b>Qd-01-01</b>   | calcareous mudstone | 757.0  | 0.59  | -9.98  | -24.44 | 0.51 | 31.7 |
| <b>Q505</b>       | calcareous mudstone | 743.8  | 0.40  | -9.66  |        |      |      |
| <b>Qd-08-01</b>   | calcareous mudstone | 737.0  | 0.20  | -9.19  | -25.09 | 0.37 | 39.0 |
| <b>Qd-09-01</b>   | calcareous mudstone | 720.5  | -0.08 | -9.71  | -25.25 | 0.23 | 44.0 |
| <b>Q499</b>       | calcareous mudstone | 719.8  | -0.15 | -9.97  | -25.15 |      |      |
| <b>Qd-10-01</b>   | calcareous mudstone | 700.0  | 0.05  | -9.19  | -24.71 | 0.21 | 51.3 |

|                 |                             |       |       |        |        |      |      |
|-----------------|-----------------------------|-------|-------|--------|--------|------|------|
| <b>Q493</b>     | calcareous mudstone         | 688.2 | -0.22 | -9.26  | -25.09 |      |      |
| <b>Qd-11-01</b> | calcareous mudstone         | 688.0 | -0.08 | -9.71  | -24.80 | 0.31 | 43.8 |
| <b>Q491</b>     | calcareous mudstone         | 679.4 | -2.23 | -9.29  | -25.18 |      |      |
| <b>Qd-12-01</b> | calcareous mudstone         | 673.0 | -0.08 | -10.42 | -24.74 | 0.20 | 31.8 |
| <b>Qd-13-01</b> | calcareous mudstone         | 662.0 | -1.78 | -9.95  | -25.40 | 0.14 | 71.0 |
| <b>Qd-14-01</b> | pyritic calcareous mudstone | 657.0 | -1.36 | -9.63  |        | 0.25 | 47.2 |
| <b>Qd-14-01</b> | calcareous shale            | 652.0 |       |        | -26.47 |      |      |
| <b>Qd-15-02</b> | calcareous shale            | 635.5 | -0.20 | -10.27 | -25.36 | 0.41 | 39.5 |
| <b>Q473</b>     | calcareous shale            | 612.2 | -1.12 | -10.06 |        |      |      |
| <b>Q457</b>     | calcareous shale            | 555.7 | -0.57 | -10.71 | -25.26 |      |      |
| <b>Q456</b>     | calcareous shale            | 553.3 | -0.80 | -10.32 | -25.37 |      |      |
| <b>Qd-50-2</b>  | calcareous mudstone         | 532.3 | -0.70 | -13.57 |        | 0.08 | 75.0 |
| <b>Q454</b>     | calcareous siltstone        | 531.1 | -0.11 | -10.19 | -24.69 |      |      |
| <b>Qd-49-1</b>  | calcareous siltstone        | 529.3 | -0.73 | -11.53 |        |      |      |
| <b>Qd-49-3</b>  | calcareous siltstone        | 525.6 | 0.43  | -9.84  |        | 0.07 | 49.0 |
| <b>Qd-49-2</b>  | calcareous siltstone        | 525.6 | 0.04  | -9.41  |        |      |      |
| <b>Q452</b>     | calcareous siltstone        | 525.1 | 0.12  | -9.22  | -24.60 |      |      |
| <b>Qd-49-4</b>  | calcareous siltstone        | 524.6 | 0.49  | -8.20  |        | 0.06 | 56.3 |
| <b>Qd-49-5</b>  | calcareous siltstone        | 522.6 | 0.30  | -9.84  |        | 0.11 | 46.6 |
| <b>Qd-49-6</b>  | calcareous siltstone        | 520.1 | 0.87  | -9.05  |        | 0.06 | 54.0 |
| <b>Qd-49-8</b>  | calcareous siltstone        | 516.1 | 0.52  | -8.64  |        | 0.11 | 57.1 |
| <b>Q449</b>     | calcareous siltstone        | 515.3 | 0.18  | -11.94 | -24.60 |      |      |
| <b>Qd-49-9</b>  | calcareous mudstone         | 514.6 | -0.08 | -9.31  |        |      |      |
| <b>Qd-49-10</b> | calcareous siltstone        | 511.6 | 0.47  | -9.20  |        | 0.10 | 52.5 |
| <b>Qd-49-11</b> | calcareous siltstone        | 510.1 | 0.66  | -8.91  |        |      |      |
| <b>Qd-49-12</b> | calcareous mudstone         | 508.1 | 0.93  | -8.71  |        | 0.16 | 52.3 |

|                  |                      |        |       |        |        |      |      |
|------------------|----------------------|--------|-------|--------|--------|------|------|
| <b>Q444</b>      | calcareous siltstone | 507.5  | 0.99  | -8.55  | -25.34 |      |      |
| <b>Qd-49-13</b>  | marl                 | 506.1  | 0.72  | -9.17  |        |      |      |
| <b>Qd-49-14</b>  | calcareous siltstone | 503.6  | 0.89  | -10.19 |        |      |      |
| <b>Qd-49-17</b>  | calcareous siltstone | 499.1  | -0.67 | -12.04 |        |      |      |
| <b>Q443</b>      | calcareous siltstone | 476.5  | 0.74  | -8.95  | -24.85 |      |      |
| <b>Q442</b>      | calcareous siltstone | 475.3  | 0.89  | -8.74  | -25.54 |      |      |
| <b>Q441</b>      | calcareous siltstone | 473.3  | 0.71  | -9.84  | -24.78 |      |      |
| <b>Q439</b>      | calcareous siltstone | 467.7  | -0.27 | -12.25 | -25.15 |      |      |
| <b>Q437-B</b>    | marl                 | 464.6  | 1.04  | -10.90 | -25.32 |      |      |
| <b>Q437</b>      | marl                 | 464.6  | 1.07  | -9.82  |        |      |      |
| <b>Qd-48-1</b>   | marl                 | 464.45 | 1.24  | -9.35  |        | 0.09 | 58.0 |
| <b>Qd-46-1</b>   | calcareous siltstone | 454.7  | 0.63  | -9.38  |        | 0.10 | 59.9 |
| <b>Q434</b>      | calcareous siltstone | 453.8  | 0.80  | -10.58 | -24.70 |      |      |
| <b>Q432</b>      | calcareous siltstone | 448.2  | 1.60  | -8.34  | -24.77 |      |      |
| <b>Q430</b>      | calcareous siltstone | 445.2  | 2.35  | -8.00  | -23.93 |      |      |
| <b>Qd-46-2</b>   | calcareous siltstone | 444.2  | 2.61  | -8.17  |        | 0.09 | 69.5 |
| <b>Q428</b>      | calcareous siltstone | 439.0  | 1.45  | -9.10  | -25.24 |      |      |
| <b>Qd-46-3</b>   | calcareous siltstone | 435.5  | 0.49  | -11.54 |        |      |      |
| <b>Q425</b>      | calcareous siltstone | 434.5  | 0.82  | -11.83 | -25.37 |      |      |
| <b>Q421</b>      | calcareous siltstone | 433.7  | 1.36  | -11.50 | -25.26 |      |      |
| <b>Q420</b>      | calcareous siltstone | 432.9  | 1.36  | -11.53 | -25.18 |      |      |
| <b>Q424</b>      | calcareous siltstone | 432.5  | 1.14  | -10.32 | -25.51 |      |      |
| <b>Q423</b>      | calcareous siltstone | 426.9  | 1.16  | -11.20 | -25.14 |      |      |
| <b>Qd-45-1</b>   | calcareous siltstone | 415.3  | 0.86  | -12.98 |        |      |      |
| <b>Qd-44a-1</b>  | calcareous shale     | 400.9  | 1.11  | -11.84 |        |      |      |
| <b>Qd-44-b-1</b> | calcareous mudstone  | 388.9  | 0.61  | -12.16 |        |      |      |

|                  |                     |       |       |        |        |      |      |
|------------------|---------------------|-------|-------|--------|--------|------|------|
| <b>Qd-44-b-2</b> | calcareous mudstone | 373.9 | 0.52  | -12.52 |        | 0.36 | 28.7 |
| <b>Qd-44-b-3</b> | calcareous mudstone | 355.9 | 0.71  | -10.71 |        |      |      |
| <b>Q419</b>      | calcareous mudstone | 353.9 | -1.49 | -8.10  |        |      |      |
| <b>Q418</b>      | calcareous mudstone | 351.1 | 1.93  | -10.29 | -25.43 |      |      |
| <b>43+40.4</b>   | calcareous mudstone | 336.3 | 0.62  | -10.87 | -25.42 | 0.15 | 61.8 |
| <b>Q414</b>      | calcareous mudstone | 335.9 | -1.18 | -9.67  | -25.04 |      |      |
| <b>43+37.4</b>   | calcareous mudstone | 333.3 | -3.03 | -9.74  | -25.57 |      |      |
| <b>43+36.8</b>   | calcareous mudstone | 332.7 | -1.84 | -10.77 | -24.82 | 0.21 | 48.8 |
| <b>Q413</b>      | calcareous mudstone | 330.3 | 2.47  | -7.61  | -25.14 |      |      |
| <b>43+33.8</b>   | calcareous mudstone | 329.7 | 0.93  | -11.31 | -24.67 | 0.26 | 50.6 |
| <b>Q412</b>      | calcareous mudstone | 328.7 | 1.79  | -10.35 | -25.34 |      |      |
| <b>43+31.8</b>   | calcareous mudstone | 327.7 | 0.32  | -10.97 | -24.86 | 0.26 | 56.3 |
| <b>43+30.8</b>   | calcareous mudstone | 326.7 | -0.55 | -9.69  | -25.20 | 0.11 | 79.1 |
| <b>Qd-44-b-4</b> | calcareous mudstone | 325.9 | 0.50  | -10.87 |        |      |      |
| <b>43+29.1</b>   | calcareous mudstone | 325.0 | 0.92  | -10.30 | -25.03 | 0.10 | 76.9 |
| <b>43+27.6</b>   | calcareous mudstone | 323.5 | 0.64  | -10.32 | -24.75 | 0.38 | 31.4 |
| <b>Q410</b>      | calcareous mudstone | 323.1 | 1.91  | -9.84  | -25.45 |      |      |
| <b>43+26.6</b>   | calcareous mudstone | 322.5 | 1.23  | -10.98 | -24.84 |      |      |
| <b>43+25.6</b>   | calcareous mudstone | 321.5 | 1.25  | -10.66 | -24.61 | 0.23 | 52.2 |
| <b>Q408</b>      | calcareous mudstone | 321.5 | 1.74  | -10.43 | -25.38 |      |      |
| <b>43+23.6</b>   | calcareous mudstone | 319.5 | 1.70  | -11.70 | -25.12 | 0.30 | 55.0 |
| <b>43+22.9</b>   | calcareous mudstone | 318.8 | 1.51  | -10.89 | -25.19 | 0.16 | 60.8 |
| <b>43+21.9</b>   | calcareous mudstone | 317.8 | 1.77  | -10.72 | -25.23 |      |      |
| <b>43+20.8</b>   | calcareous mudstone | 316.7 | 1.45  | -11.62 | -25.30 | 0.30 | 56.2 |
| <b>43+19.9</b>   | calcareous mudstone | 315.8 | 1.98  | -10.34 | -25.50 | 0.31 | 59.4 |
| <b>43+18.8</b>   | calcareous mudstone | 314.7 | 1.78  | -9.68  | -25.37 | 0.09 | 83.5 |

|                  |                      |       |       |        |        |      |      |
|------------------|----------------------|-------|-------|--------|--------|------|------|
| <b>43+17.8</b>   | calcareous mudstone  | 313.7 | 1.94  | -9.75  | -25.44 | 0.08 | 84.6 |
| <b>Q406</b>      | calcareous mudstone  | 313.1 | 2.81  | -8.46  | -25.17 |      |      |
| <b>43+16.6</b>   | calcareous mudstone  | 312.5 | 1.80  | -10.12 | -25.26 | 0.17 | 65.5 |
| <b>43+15.6</b>   | calcareous mudstone  | 311.5 | 1.84  | -9.84  | -25.38 | 0.14 | 69.2 |
| <b>43+13.6</b>   | calcareous mudstone  | 309.5 | 1.52  | -10.36 | -25.19 | 0.16 | 65.0 |
| <b>43+11.1</b>   | calcareous mudstone  | 307.0 | 1.92  | -11.03 | -25.55 | 0.27 | 60.2 |
| <b>43+9.6</b>    | calcareous mudstone  | 305.5 | 2.25  | -9.81  | -25.40 | 0.19 | 69.6 |
| <b>43+8.8</b>    | calcareous mudstone  | 304.7 | 2.09  | -10.22 | -25.39 | 0.17 | 70.4 |
| <b>43+8.2</b>    | calcareous mudstone  | 304.1 | 2.42  | -9.89  | -25.32 | 0.15 | 72.4 |
| <b>43+6.2</b>    | calcareous mudstone  | 302.1 | 2.51  | -9.92  | -25.33 | 0.10 | 76.7 |
| <b>43+5.2</b>    | calcareous mudstone  | 301.1 | 2.26  | -9.65  | -25.40 | 0.04 | 91.0 |
| <b>Qd-44-b-5</b> | calcareous mudstone  | 300.9 | 2.55  | -9.94  |        |      |      |
| <b>43+3.7</b>    | calcareous mudstone  | 299.6 | 1.95  | -10.07 | -25.42 | 0.15 | 75.7 |
| <b>43+2</b>      | calcareous mudstone  | 297.9 | 1.93  | -9.64  | -25.40 | 0.15 | 82.7 |
| <b>Q401</b>      | calcareous mudstone  | 297.1 | 2.12  | -10.80 | -25.08 |      |      |
| <b>Q400</b>      | calcareous mudstone  | 296.5 | 2.41  | -10.33 | -25.07 |      |      |
| <b>Q399</b>      | calcareous mudstone  | 296.3 | 2.59  | -9.79  | -25.27 |      |      |
| <b>Q397</b>      | calcareous siltstone | 287.9 | -0.22 | -12.07 | -25.31 |      |      |
| <b>Q396</b>      | calcareous siltstone | 284.7 | 1.37  | -11.28 | -25.01 |      |      |
| <b>Q395</b>      | calcareous siltstone | 283.5 | -0.11 | -11.52 | -24.78 |      |      |
| <b>Q394</b>      | calcareous siltstone | 282.3 | 0.09  | -13.61 | -25.06 |      |      |
| <b>Q392</b>      | calcareous siltstone | 281.3 | -0.52 | -14.24 | -24.67 |      |      |
| <b>Q387</b>      | calcareous siltstone | 272.5 | -0.03 | -12.07 |        |      |      |
| <b>Q385</b>      | calcareous siltstone | 268.1 | 0.44  | -12.05 | -24.98 |      |      |
| <b>Q384</b>      | calcareous siltstone | 265.1 | -0.85 | -11.86 | -25.12 |      |      |
| <b>Q379</b>      | calcareous siltstone | 248.9 | 0.19  | -9.16  | -25.56 |      |      |

|                    |                      |       |       |        |        |      |
|--------------------|----------------------|-------|-------|--------|--------|------|
| <b>Qd-42-b-1</b>   | calcareous siltstone | 248.9 | 4.29  | -13.11 |        |      |
| <b>Qd-41-1</b>     | calcareous siltstone | 245.6 | 1.85  | -14.41 |        |      |
| <b>Q377</b>        | calcareous shale     | 229.7 | -0.37 | -13.73 | -24.83 |      |
| <b>Qd-40-2</b>     | calcareous mudstone  | 184.3 | -0.09 | -10.14 |        |      |
| <b>Qd-38-1</b>     | calcareous mudstone  | 169.7 | 0.28  | -11.45 |        |      |
| <b>Qd-d01-02</b>   | calcareous mudstone  | 159.2 | -0.06 | -13.43 |        |      |
| <b>Qd-d01-02</b>   | calcareous mudstone  | 159.2 | -0.06 | -13.43 | -25.12 |      |
| <b>Qd-38b-1</b>    | calcareous shale     | 158.7 | 1.16  | -12.65 |        |      |
| <b>Qd-38b-5</b>    | calcareous mudstone  | 150.2 | 1.13  | -14.71 |        |      |
| <b>Qd-38b-6</b>    | calcareous mudstone  | 142.2 | -0.01 | -13.05 |        |      |
| <b>Qd-38C-2</b>    | calcareous mudstone  | 137.2 | 0.46  | -11.83 |        |      |
| <b>Qd-38C-3'''</b> | calcareous mudstone  | 124.7 | 0.23  | -11.86 |        |      |
| <b>Qd-38C-4</b>    | calcareous mudstone  | 123.7 | 0.01  | -12.39 |        |      |
| <b>Qd-38C-5</b>    | calcareous mudstone  | 122.2 | 0.00  | -12.44 |        |      |
| <b>Qd-38C-6</b>    | calcareous mudstone  | 121.2 | 0.30  | -14.16 |        |      |
| <b>Qd-38C-7</b>    | calcareous mudstone  | 120.2 | 0.40  | -12.83 |        |      |
| <b>Qd-38C-8</b>    | calcareous mudstone  | 119.2 | 0.23  | -13.00 |        |      |
| <b>Qd-38C-9</b>    | calcareous mudstone  | 118.2 | -0.04 | -12.84 | 0.49   | 25.8 |
| <b>Qd-38C-10</b>   | calcareous mudstone  | 116.7 | -0.31 | -12.62 |        |      |
| <b>Qd-38C-12</b>   | calcareous mudstone  | 114.7 | 0.66  | -12.93 |        |      |
| <b>Qd-38C-13</b>   | calcareous mudstone  | 113.2 | 0.04  | -13.01 |        |      |
| <b>Qd-d02-02</b>   | calcareous mudstone  | 112.7 | -1.77 | -14.54 | -24.60 |      |
| <b>Qd-38C-14</b>   | calcareous mudstone  | 111.7 | 0.50  | -13.41 |        |      |
| <b>Qd-38d-1'</b>   | calcareous mudstone  | 111.2 | -0.99 | -12.53 |        |      |
| <b>Qd-38d-3</b>    | calcareous mudstone  | 110.0 | -2.80 | -11.18 |        |      |
| <b>Qd-38d-4</b>    | calcareous mudstone  | 108.2 | -2.19 | -11.50 |        |      |



|                   |                      |       |       |        |        |      |      |
|-------------------|----------------------|-------|-------|--------|--------|------|------|
| <b>Qd-38d-5</b>   | calcareous mudstone  | 107.2 | -0.75 | -11.47 |        |      |      |
| <b>Qd-38d-6</b>   | calcareous mudstone  | 106.2 | -0.20 | -11.85 |        |      |      |
| <b>Qd-38e-1</b>   | calcareous mudstone  | 103.2 | -0.38 | -11.58 |        |      |      |
| <b>Qd-38e-2</b>   | calcareous mudstone  | 101.2 | 2.06  | -13.47 |        |      |      |
| <b>Qd-38e-3</b>   | calcareous mudstone  | 98.2  | -0.36 | -11.72 |        |      |      |
| <b>Qd-38e-4</b>   | calcareous mudstone  | 95.7  | -0.13 | -13.28 |        |      |      |
| <b>Qd-38e-5</b>   | calcareous mudstone  | 92.2  | -0.34 | -12.38 |        | 0.86 | 29.7 |
| <b>Qd-37-1</b>    | calcareous siltstone | 84.45 | -1.89 | -12.19 |        |      |      |
| <b>Qd-36a-6'</b>  | calcareous mudstone  | 82.0  | 2.76  | -14.48 |        |      |      |
| <b>Qd-d05-01</b>  | calcareous mudstone  | 81.0  | -0.72 | -12.12 | -24.05 |      |      |
| <b>Qd-36a-9'</b>  | calcareous mudstone  | 79.5  | 1.11  | -12.09 |        |      |      |
| <b>Qd-36b-1'</b>  | calcareous shale     | 77.0  | -1.23 | -12.47 |        |      |      |
| <b>Qd-d08-01</b>  | calcareous shale     | 69.0  | 1.41  | -14.02 | -24.11 |      |      |
| <b>Qd-36a-7'</b>  | calcareous shale     | 69.0  | 1.15  | -9.86  |        | 0.97 | 21.1 |
| <b>Qd-36b-12'</b> | calcareous shale     | 62.0  | 3.39  | -15.96 | -24.67 |      |      |
| <b>Qd-d10-01</b>  | calcareous shale     | 49.0  | -1.24 | -11.86 | -24.78 |      |      |
| <b>Qd-d11-01</b>  | calcareous shale     | 37.0  | -1.40 | -12.03 | -24.36 | 0.81 | 8.4  |
| <b>Qd-d12-01</b>  | calcareous shale     | 37.0  | -1.08 | -11.54 | -24.88 |      |      |

**Table S2. Lithologic and geochemical data of Gambadongshan Formation samples (9 limestone nodule horizons)**

| Horizon        | Sample No.      | Lithology            | Carbonate fabric    | Depth (m) | $\delta^{13}\text{C}_{\text{carb}}$ (VPDB, ‰) | $\delta^{18}\text{O}_{\text{carb}}$ (VPDB, ‰) | $\delta^{13}\text{C}_{\text{org}}$ (VPDB, ‰) | TOC (%) | TIC (%) |
|----------------|-----------------|----------------------|---------------------|-----------|-----------------------------------------------|-----------------------------------------------|----------------------------------------------|---------|---------|
| QDS9<br>(10 m) | Qd-54-50-top    | nodular carbonate    | micrite matrix (mm) | 883.0     | -13.53                                        | -5.15                                         |                                              |         |         |
|                | Qd-54-50-4      | nodular carbonate    | micrite matrix (mm) | 878.0     | -17.98                                        | -4.86                                         |                                              | 0.05    | 49.5    |
|                | Qd-54-50-3      | nodular carbonate    | micrite matrix (mm) | 878.0     | -18.28                                        | -5.22                                         |                                              | 0.04    | 91.2    |
|                | Qd-54-50-2      | nodular carbonate    | micrite matrix (mm) | 878.0     | -14.60                                        | -6.17                                         |                                              |         |         |
|                | Qd-54-50-1      | nodular carbonate    | micrite matrix (mm) | 878.0     | -14.72                                        | -5.66                                         |                                              |         |         |
|                | Qd-54-50-bottom | nodular carbonate    | micrite matrix (mm) | 873.0     | -3.19                                         | -6.63                                         | -25.92                                       | 0.09    | 85.1    |
| QDS8<br>(19 m) | Q524            | carbonate            | micrite matrix (mm) | 793.0     | -12.59                                        | -6.76                                         | -27.91                                       |         |         |
|                | Q523            | carbonate            | micrite matrix (mm) | 791.16    | -12.43                                        | -7.34                                         | -27.77                                       |         |         |
|                | Qd-54-44'       | carbonate concretion | micrite matrix (mm) | 786.0     | -15.71                                        | -7.06                                         | -25.05                                       |         |         |
|                | Q520            | carbonate            | micrite matrix (mm) | 785.4     | -12.97                                        | -9.11                                         | -28.67                                       |         |         |
|                | Q518            | carbonate            | micrite matrix (mm) | 777.0     | -13.82                                        | -6.89                                         | -27.20                                       |         |         |
|                | Qd-54-38'       | carbonate concretion | micrite matrix (mm) | 777.0     | -12.75                                        | -8.34                                         | -24.75                                       |         |         |
|                | Qd-54-36        | carbonate concretion | micrite matrix (mm) | 775.4     | -14.69                                        | -7.55                                         | -26.06                                       |         |         |
|                | Qd-54-35'       | carbonate concretion | micrite matrix (mm) | 774.9     | -16.54                                        | -6.64                                         | -26.63                                       |         |         |
|                | Qd-54-35        | black shale          | micrite matrix (mm) | 774.9     | -13.10                                        | -7.92                                         | -25.10                                       | 0.31    | 38.4    |
|                | Qd-54-34        | carbonate concretion | micrite matrix (mm) | 774.4     | -12.07                                        | -7.23                                         | -26.96                                       |         |         |
|                | Qd-54-33        | carbonate concretion | micrite matrix (mm) | 774.0     | -13.45                                        | -6.68                                         | -28.31                                       | 0.12    | 75.5    |
| QDS7<br>(20 m) | Q514            | carbonate            | micrite matrix (mm) | 759.8     | -15.27                                        | -6.48                                         |                                              | 0.01    | 97.4    |
|                | Qd-54-4         | carbonate concretion | micrite matrix (mm) | 750.8     | -9.57                                         | -5.64                                         |                                              |         |         |
|                | Qd-03-01        | carbonate concretion | micrite matrix (mm) | 750.0     | -18.11                                        | -5.29                                         |                                              |         |         |
|                | Qd-53-a-5       | carbonate            | micrite matrix (mm) | 749.0     | -22.63                                        | -5.52                                         | -26.13                                       | 0.05    | 90.9    |
|                | Qd-53-a-4       | carbonate            | micrite matrix (mm) | 748.3     | -19.43                                        | -5.67                                         | -26.08                                       | 0.06    | 88.3    |
|                | Q510            | grey nodular         | bulk rock           | 748.1     | -17.13                                        | -6.15                                         | -27.16                                       |         |         |

|               |                   |                           |        |        |        |        |
|---------------|-------------------|---------------------------|--------|--------|--------|--------|
|               | carbonate         |                           |        |        |        |        |
| Qd-53-a-2     | carbonate         | micrite matrix (mm)       | 748.0  | -17.98 | -5.51  | -26.00 |
| Qd-53-a-1     | carbonate         | micrite matrix (mm)       | 747.8  | -18.80 | -6.15  | -26.92 |
| Qd-53-C-3     | carbonate         | micrite matrix (mm)       | 747.4  | -18.49 | -5.26  | -25.72 |
| Qd-05-01-I-14 | nodular carbonate | botryoidalis calcite (bc) | 747.15 | -20.67 | -2.65  |        |
| Qd-05-01-I-13 | nodular carbonate | botryoidalis calcite (bc) | 747.15 | -17.78 | -3.72  |        |
| Qd-05-01-I-9  | nodular carbonate | botryoidalis calcite (bc) | 747.15 | -20.26 | -2.57  |        |
| Qd-05-01-I-8  | nodular carbonate | micrite matrix (mm)       | 747.15 | -10.62 | -10.80 |        |
| Qd-05-01-I-7  | nodular carbonate | micrite matrix (mm)       | 747.15 | -16.01 | -6.33  |        |
| Qd-05-01-I-6  | nodular carbonate | micrite matrix (mm)       | 747.15 | -10.10 | -8.31  |        |
| Qd-05-01-I-5  | nodular carbonate | clotted calcite (clot)    | 747.15 | -21.22 | -3.54  |        |
| Qd-05-01-I-4  | nodular carbonate | clotted calcite (clot)    | 747.15 | -16.93 | -6.70  |        |
| Qd-05-01-I-2  | nodular carbonate | micrite matrix (mm)       | 747.15 | -22.15 | -5.34  |        |
| Qd-05-01-I-3  | nodular carbonate | micrite matrix (mm)       | 747.15 | -22.78 | -5.58  |        |
| Qd-05-01-I-2  | nodular carbonate | micrite matrix (mm)       | 747.15 | -22.82 | -5.60  |        |
| Qd-05-01-I-1  | nodular carbonate | micrite matrix (mm)       | 747.15 | -23.30 | -5.63  |        |
| Qd-05-01-H-20 | nodular carbonate | micrite matrix (mm)       | 747.15 | -15.13 | -5.49  |        |
| Qd-05-01-H-18 | nodular carbonate | micrite matrix (mm)       | 747.15 | -16.93 | -3.62  |        |
| Qd-05-01-H-14 | nodular carbonate | yellow sparite (sp)       | 747.15 | -0.91  | -13.38 |        |
| Qd-05-01-H-13 | nodular carbonate | yellow sparite (sp)       | 747.15 | -1.18  | -10.40 |        |
| Qd-05-01-H-12 | nodular carbonate | yellow sparite (sp)       | 747.15 | -0.34  | -12.59 |        |
| Qd-05-01-H-11 | nodular carbonate | yellow sparite (sp)       | 747.15 | -3.04  | -14.27 |        |
| Qd-05-01-H-10 | nodular carbonate | yellow sparite (sp)       | 747.15 | -13.63 | -3.78  |        |
| Qd-05-01-H-9  | nodular carbonate | micrite matrix (mm)       | 747.15 | -17.14 | -4.49  |        |
| Qd-05-01-H-9  | nodular carbonate | yellow sparite (sp)       | 747.15 | -4.34  | -9.42  |        |
| Qd-05-01-H-7  | nodular carbonate | yellow sparite (sp)       | 747.15 | -4.59  | -9.99  |        |

|              |                   |                     |        |        |       |
|--------------|-------------------|---------------------|--------|--------|-------|
| Qd-05-01-H-6 | nodular carbonate | yellow sparite (sp) | 747.15 | -12.51 | -6.13 |
| Qd-05-01-H-5 | nodular carbonate | micrite matrix (mm) | 747.15 | -5.84  | -9.40 |
| Qd-05-01-H-4 | nodular carbonate | micrite matrix (mm) | 747.15 | -15.13 | -5.49 |
| Qd-05-01-H-3 | nodular carbonate | micrite matrix (mm) | 747.15 | -15.15 | -6.01 |
| Qd-05-01-H-2 | nodular carbonate | micrite matrix (mm) | 747.15 | -16.61 | -5.64 |
| Qd-05-01-H-2 | nodular carbonate | micrite matrix (mm) | 747.15 | -16.63 | -5.78 |
| Qd-05-01-H-1 | nodular carbonate | micrite matrix (mm) | 747.15 | -15.87 | -5.60 |
| Qd-05-01-G-1 | nodular carbonate | micrite matrix (mm) | 747.15 | -20.85 | -5.97 |
| Qd-05-01-F-8 | nodular carbonate | micrite matrix (mm) | 747.15 | -23.28 | -6.17 |
| Qd-05-01-F-7 | nodular carbonate | micrite matrix (mm) | 747.15 | -23.63 | -5.25 |
| Qd-05-01-F-6 | nodular carbonate | micrite matrix (mm) | 747.15 | -25.73 | -5.27 |
| Qd-05-01-F-5 | nodular carbonate | micrite matrix (mm) | 747.15 | -26.15 | -5.50 |
| Qd-05-01-F-5 | nodular carbonate | micrite matrix (mm) | 747.15 | -26.43 | -5.55 |
| Qd-05-01-F-4 | nodular carbonate | micrite matrix (mm) | 747.15 | -20.97 | -6.07 |
| Qd-05-01-F-1 | nodular carbonate | micrite matrix (mm) | 747.15 | -22.00 | -5.12 |
| Qd-05-01-E-2 | nodular carbonate | micrite matrix (mm) | 747.15 | -20.68 | -6.44 |
| Qd-05-01-E-1 | nodular carbonate | micrite matrix (mm) | 747.15 | -20.80 | -5.44 |
| Qd-05-01-D-5 | nodular carbonate | micrite matrix (mm) | 747.15 | -22.00 | -4.95 |
| Qd-05-01-D-4 | nodular carbonate | micrite matrix (mm) | 747.15 | -21.31 | -5.10 |
| Qd-05-01-D-3 | nodular carbonate | micrite matrix (mm) | 747.15 | -23.46 | -5.04 |
| Qd-05-01-D-2 | nodular carbonate | micrite matrix (mm) | 747.15 | -23.38 | -5.05 |
| Qd-05-01-D-1 | nodular carbonate | micrite matrix (mm) | 747.15 | -23.50 | -5.02 |
| Qd-05-01-C-3 | nodular carbonate | micrite matrix (mm) | 747.15 | -20.97 | -5.68 |
| Qd-05-01-C-2 | nodular carbonate | micrite matrix (mm) | 747.15 | -21.59 | -5.84 |
| Qd-05-01-C-1 | nodular carbonate | micrite matrix (mm) | 747.15 | -21.15 | -5.72 |
| Qd-05-01-B-8 | nodular carbonate | yellow calcite (yc) | 747.15 | -1.26  | -8.63 |

|        |              |                      |                     |        |        |       |        |      |      |
|--------|--------------|----------------------|---------------------|--------|--------|-------|--------|------|------|
|        | Qd-05-01-B-7 | nodular carbonate    | yellow calcite (yc) | 747.15 | -1.11  | -8.56 |        |      |      |
|        | Qd-05-01-B-6 | nodular carbonate    | yellow calcite (yc) | 747.15 | -1.46  | -8.96 |        |      |      |
|        | Qd-05-01-B-5 | nodular carbonate    | micrite matrix (mm) | 747.15 | -11.28 | -7.74 |        |      |      |
|        | Qd-05-01-B-4 | nodular carbonate    | micrite matrix (mm) | 747.15 | -19.02 | -6.65 |        |      |      |
|        | Qd-05-01-B-3 | nodular carbonate    | micrite matrix (mm) | 747.15 | -20.62 | -5.64 |        |      |      |
|        | Qd-05-01-B-2 | nodular carbonate    | micrite matrix (mm) | 747.15 | -22.60 | -5.27 |        |      |      |
|        | Qd-05-01-B-1 | nodular carbonate    | micrite matrix (mm) | 747.15 | -21.67 | -5.25 |        |      |      |
|        | Qd-05-01-A-4 | nodular carbonate    | yellow sparite (sp) | 747.15 | -0.81  | -8.47 |        |      |      |
|        | Qd-05-01-A-3 | nodular carbonate    | micrite matrix (mm) | 747.15 | -14.23 | -7.43 |        | 0.03 | 95.4 |
|        | Qd-05-01-A-2 | nodular carbonate    | micrite matrix (mm) | 747.15 | -21.07 | -5.61 | -28.87 | 0.05 | 90.4 |
|        | Qd-05-01-A-1 | nodular carbonate    | micrite matrix (mm) | 747.15 | -18.74 | -5.89 | -26.26 | 0.08 | 85.0 |
|        | Qd-53-c-2    | carbonate            | micrite matrix (mm) | 746.8  | -18.72 | -6.08 | -26.15 |      |      |
|        | Qd-53-c-1    | carbonate            | micrite matrix (mm) | 746.4  | -23.50 | -5.18 | -25.88 | 0.08 | 90.2 |
|        | Qd-53-e-1    | carbonate            | micrite matrix (mm) | 745.85 | -16.45 | -5.45 | -25.75 | 0.17 | 62.6 |
|        | Q509         | nodular carbonate    | bulk rock           | 745.7  | -19.83 | -5.98 | -22.26 |      |      |
|        | Qd-53-g-1    | carbonate            | micrite matrix (mm) | 745.4  | -13.42 | -5.48 | -26.26 | 0.03 | 92.3 |
|        | Qd-52-1      | carbonate concretion | micrite matrix (mm) | 743.3  | -9.78  | -6.47 |        |      |      |
|        | Qd-52-2      | mudstone             | micrite matrix (mm) | 741.3  | -8.34  | -8.16 |        | 0.33 | 47.7 |
|        | Qd-52-3      | carbonate concretion | micrite matrix (mm) | 716.3  | -13.06 | -7.44 |        |      |      |
|        | Qd-52-4      | carbonate concretion | micrite matrix (mm) | 646.3  | -1.22  | -9.80 |        | 0.14 | 71.8 |
|        | Qd-52-5      | carbonate concretion | micrite matrix (mm) | 633.3  | -13.59 | -8.30 |        | 0.14 | 74.1 |
|        | Qd-15-01f    | carbonate concretion | micrite matrix (mm) | 619.5  |        |       |        | 0.08 | 86.7 |
| QDS6   | Qd-15-01-2   | carbonate concretion | micrite matrix (mm) | 619.5  | -17.76 | -6.20 |        |      |      |
| (23 m) | Qd-15-01-2   | carbonate concretion | micrite matrix (mm) | 619.5  | -17.86 | -6.38 |        |      |      |
|        | Qd-15-01-1   | carbonate concretion | micrite matrix (mm) | 619.5  | -15.40 | -6.62 |        |      |      |
|        | Qd-52-6-A    | carbonate concretion | micrite matrix (mm) | 610.3  | -16.11 | -6.87 |        |      |      |

|                |                   |                             |                             |       |        |        |        |      |
|----------------|-------------------|-----------------------------|-----------------------------|-------|--------|--------|--------|------|
|                | Qd-52-6-B         | carbonate concretion        | micrite matrix (mm)         | 610.3 | -15.34 | -6.84  |        |      |
| QDS5<br>(17 m) | Qd-50-1           | carbonate concretion        | micrite matrix (mm)         | 516.5 | -17.52 | -4.94  | 0.08   | 83.7 |
|                | Qd-50-3           | carbonate concretion        | micrite matrix (mm)         | 514.8 | -16.58 | -5.22  | 0.05   | 93.3 |
|                | Qd-50-2           | carbonate concretion        | micrite matrix (mm)         | 514.8 | -18.37 | -5.67  |        |      |
|                | Qd-49-7           | carbonate concretion        | micrite matrix (mm)         | 518.6 | -0.41  | -8.99  |        |      |
|                | Qd-49-15          | carbonate concretion        | micrite matrix (mm)         | 501.6 | 0.08   | -9.46  | 0.10   | 61.3 |
|                | Qd-49-16          | carbonate concretion        | micrite matrix (mm)         | 500.6 | -1.06  | -9.23  | 0.08   | 56.3 |
|                | 43+37             | carbonate concretion        | micrite matrix (mm)         | 332.9 | -6.85  | -8.23  | -24.86 | 0.06 |
| QDS4<br>(6 m)  | Qd-43-1-B         | nodular carbonate           | micrite matrix (mm)         | 278.4 | -1.23  | -9.14  |        |      |
|                | Qd-43-1-A         | nodular carbonate           | micrite matrix (mm)         | 278.4 | 2.72   | -9.52  | 0.08   | 87.3 |
|                | Qd-43-2(5)-C      | nodular carbonate           | calcite cement (cc: b or w) | 272.4 | -2.10  | -11.20 |        |      |
|                | Qd-43-2(5)-B      | nodular carbonate           | white calcite (w)           | 272.4 | -16.54 | -2.47  |        |      |
|                | Qd-43-2(5)-A      | nodular carbonate           | micrite matrix (mm)         | 275.4 | -17.37 | -10.70 | -25.86 |      |
|                | Qd-43-2(4)-E      | nodular carbonate           | calcite cement (cc: b or w) | 275.4 | -1.80  | -11.00 |        |      |
|                | Qd-43-2(4)-D      | nodular carbonate           | white calcite (w)           | 275.4 | -1.64  | -7.97  |        |      |
|                | Qd-43-2(4)-C      | nodular carbonate           | micrite matrix (mm)         | 275.4 | -13.44 | -11.04 |        |      |
|                | Qd-43-2(4)-B      | nodular carbonate           | micrite matrix (mm)         | 275.4 | -20.52 | -7.05  |        |      |
|                | Qd-43-2(4)-A      | nodular carbonate           | black calcite (b)           | 275.4 | -18.83 | -3.38  |        |      |
|                | Qd-43-2(3)-C      | nodular carbonate           | white calcite (w)           | 275.4 | -2.81  | -9.71  |        |      |
|                | Qd-43-2(3)-B      | nodular carbonate           | black calcite (b)           | 275.4 | -12.10 | -8.38  | 0.05   | 88.3 |
|                | Qd-43-2(3)-A      | nodular carbonate           | micrite matrix (mm)         | 275.4 | -20.71 | -5.99  |        |      |
|                | Qd-43-2(2)-C      | nodular carbonate           | calcite cement (cc: b or w) | 275.4 | -0.80  | -11.40 |        |      |
|                | Qd-43-2(2)-B      | nodular carbonate           | calcite cement (cc: b or w) | 275.4 | -3.05  | -8.81  |        |      |
|                | Qd-43-2(2)-A      | nodular carbonate           | micrite matrix (mm)         | 275.4 | 1.21   | -5.80  |        |      |
|                | Qd-43-2(1)-C      | nodular carbonate           | calcite cement (cc: b or w) | 275.4 | -1.70  | -10.80 |        |      |
| Qd-43-2(1)-B   | nodular carbonate | calcite cement (cc: b or w) | 275.4                       | -5.89 | -10.02 | 0.02   | 97.5   |      |



|                 |               |                      |                             |       |        |        |        |      |
|-----------------|---------------|----------------------|-----------------------------|-------|--------|--------|--------|------|
|                 | Qd-43-2(1)-A  | nodular carbonate    | micrite matrix (mm)         | 275.4 | -16.32 | -8.22  | 0.02   | 94.9 |
|                 | Qd-43-3-A     | carbonate concretion | micrite matrix (mm)         | 272.4 | -12.24 | -7.62  |        |      |
|                 | Qd-43-3-B     | carbonate concretion | botryoidalis calcite (bc)   | 272.4 | -13.93 | -4.28  |        |      |
|                 | Q393          | carbonate concretion | micrite matrix (mm)         | 265.9 | -0.85  | -13.21 |        |      |
|                 | Q389          | carbonate concretion | micrite matrix (mm)         | 263.9 | -4.88  | -10.35 | -26.68 |      |
|                 | Qd-40-1       | carbonate concretion | micrite matrix (mm)         | 234.3 | -3.28  | -10.59 | 0.24   | 24.8 |
| QDS-3<br>(33 m) | Qd-38b-1'     | carbonate concretion | micrite matrix (mm)         | 142.4 | -4.66  | -11.60 |        |      |
|                 | Qd-38b-1      | carbonate concretion | micrite matrix (mm)         | 142.4 | -6.03  | -10.28 |        |      |
|                 | Qd-38b-2      | carbonate concretion | micrite matrix (mm)         | 139.2 | -10.26 | -9.52  | 0.18   | 62.7 |
|                 | Qd-38b-3      | carbonate concretion | micrite matrix (mm)         | 137.2 | -8.18  | -10.37 |        |      |
|                 | Qd-38b-4      | carbonate concretion | micrite matrix (mm)         | 136.2 | -5.77  | -9.93  |        |      |
|                 | Qd-38b-5'     | nodular carbonate    | micrite matrix (mm)         | 134.2 | -6.36  | -11.05 |        |      |
|                 | Qd-38b-6'     | carbonate concretion | micrite matrix (mm)         | 126.2 | -16.53 | -9.67  |        |      |
|                 | Qd-38C-1      | carbonate concretion | micrite matrix (mm)         | 125.2 | -12.57 | -9.79  |        |      |
|                 | Qd-38C-3      | carbonate concretion | micrite matrix (mm)         | 110.2 | -13.17 | -9.85  |        |      |
|                 | Qd-38C-3'     | carbonate concretion | micrite matrix (mm)         | 109.7 | -12.64 | -9.92  |        |      |
|                 | Qd-38C-3"     | carbonate concretion | micrite matrix (mm)         | 109.2 | -15.05 | -9.92  |        |      |
|                 | Qd-38d(top)-C | nodular carbonate    | white calcite (w)           | 95.2  | -3.13  | -12.90 |        |      |
|                 | Qd-38d(top)-B | nodular carbonate    | micrite matrix (mm)         | 95.2  | -25.60 | -8.22  |        |      |
|                 | Qd-38d(top)-A | nodular carbonate    | calcite cement (cc: b or w) | 95.2  | -27.29 | -3.43  | 0.24   | 88.1 |
| QDS-2<br>(5 m)  | Qd-38d-1      | carbonate concretion | micrite matrix (mm)         | 95.2  | -23.61 | -9.43  |        |      |
|                 | Qd-do3-01-D-6 | nodular carbonate    | micrite matrix (mm)         | 95.2  | -10.52 | -11.49 |        |      |
|                 | Qd-do3-01-D-4 | nodular carbonate    | micrite matrix (mm)         | 95.2  | -20.36 | -9.34  |        |      |
|                 | Qd-do3-01-D-3 | nodular carbonate    | micrite matrix (mm)         | 95.2  | -25.91 | -4.22  |        |      |
|                 | Qd-do3-01-D-2 | nodular carbonate    | micrite matrix (mm)         | 95.2  | -28.54 | -5.25  |        |      |
|                 | Qd-do3-01-D-1 | nodular carbonate    | micrite matrix (mm)         | 95.2  | -26.95 | -6.65  |        |      |

---

|                |                   |                             |      |        |        |      |      |
|----------------|-------------------|-----------------------------|------|--------|--------|------|------|
| Qd-do3-01-C-20 | nodular carbonate | micrite matrix (mm)         | 95.2 | -24.54 | -4.90  |      |      |
| Qd-do3-01-C-18 | nodular carbonate | micrite matrix (mm)         | 95.2 | -20.27 | -8.43  |      |      |
| Qd-do3-01-C-16 | nodular carbonate | white calcite (w)           | 95.2 | -24.24 | -7.35  |      |      |
| Qd-do3-01-C-15 | nodular carbonate | black calcite (b)           | 95.2 | -29.96 | -2.48  |      |      |
| Qd-do3-01-C-14 | nodular carbonate | white calcite (w)           | 95.2 | -28.94 | -4.52  |      |      |
| Qd-do3-01-C-13 | nodular carbonate | black calcite (b)           | 95.2 | -32.29 | -1.59  |      |      |
| Qd-do3-01-C-12 | nodular carbonate | black calcite (b)           | 95.2 | -28.14 | -2.37  |      |      |
| Qd-do3-01-C-11 | nodular carbonate | white calcite (w)           | 95.2 | -25.35 | -5.93  |      |      |
| Qd-do3-01-C-10 | nodular carbonate | black calcite (b)           | 95.2 | -31.09 | -1.62  |      |      |
| Qd-do3-01-C-9  | nodular carbonate | white calcite (w)           | 95.2 | -19.35 | -8.30  |      |      |
| Qd-do3-01-C-8  | nodular carbonate | white calcite (w)           | 95.2 | -22.73 | -7.60  |      |      |
| Qd-do3-01-C-7  | nodular carbonate | black calcite (b)           | 95.2 | -30.83 | -1.72  |      |      |
| Qd-do3-01-C-5  | nodular carbonate | black calcite (b)           | 95.2 | -31.43 | -0.99  |      |      |
| Qd-do3-01-C-4  | nodular carbonate | white calcite (w)           | 95.2 | -20.46 | -8.01  |      |      |
| Qd-do3-01-C-3  | nodular carbonate | calcite cement (cc: b or w) | 95.2 | -22.16 | -7.15  |      |      |
| Qd-do3-01-C-2  | nodular carbonate | calcite cement (cc: b or w) | 95.2 | -30.30 | -2.20  |      |      |
| Qd-do3-01-C-1  | nodular carbonate | micrite matrix (mm)         | 95.2 | -26.39 | -9.19  | 0.08 | 91.2 |
| Qd-do3-01-B-6  | nodular carbonate | micrite matrix (mm)         | 95.2 | -21.19 | -4.46  |      |      |
| Qd-do3-01-B-5  | nodular carbonate | micrite matrix (mm)         | 95.2 | -28.16 | -5.59  |      |      |
| Qd-do3-01-B-4  | nodular carbonate | micrite matrix (mm)         | 95.2 | -25.69 | -6.89  |      |      |
| Qd-do3-01-B-3  | nodular carbonate | micrite matrix (mm)         | 95.2 | -16.46 | -6.85  |      |      |
| Qd-do3-01-B-2  | nodular carbonate | calcite cement (cc: b or w) | 95.2 | -19.72 | -6.10  |      |      |
| Qd-do3-01-B-1  | nodular carbonate | micrite matrix (mm)         | 95.2 | -19.78 | -8.39  |      |      |
| Qd-do3-01-A-5  | nodular carbonate | calcite cement (cc: b or w) | 95.2 | -28.85 | -4.48  |      |      |
| Qd-do3-01-A-3  | nodular carbonate | micrite matrix (mm)         | 95.2 | -19.06 | -10.08 |      |      |
| Qd-do3-01-A-2  | nodular carbonate | micrite matrix (mm)         | 95.2 | -29.17 | -4.56  |      |      |

|               |                   |                             |      |        |        |      |      |
|---------------|-------------------|-----------------------------|------|--------|--------|------|------|
| Qd-do3-01-A-1 | nodular carbonate | micrite matrix (mm)         | 95.2 | -27.26 | -7.00  | 0.13 | 90.5 |
| Qd-38d-3'     | nodular carbonate | micrite matrix (mm)         | 94.0 | -26.18 | -8.23  | 0.12 | 89.1 |
| Qd-do3-02-C-3 | nodular carbonate | calcite cement (cc: b or w) | 93.2 | -24.12 | -5.02  |      |      |
| Qd-do3-02-C-2 | nodular carbonate | calcite cement (cc: b or w) | 93.2 | -20.26 | -6.21  |      |      |
| Qd-do3-02-C-1 | nodular carbonate | micrite matrix (mm)         | 93.2 | -21.35 | -10.14 |      |      |
| Qd-do3-02-B-7 | nodular carbonate | micrite matrix (mm)         | 93.2 | -28.15 | -2.66  | 0.10 | 90.4 |
| Qd-do3-02-B-6 | nodular carbonate | micrite matrix (mm)         | 93.2 | -28.24 | -2.76  |      |      |
| Qd-do3-02-B-5 | nodular carbonate | micrite matrix (mm)         | 93.2 | -26.99 | -9.16  |      |      |
| Qd-do3-02-B-3 | nodular carbonate | calcite cement (cc: b or w) | 93.2 | -13.84 | -9.38  |      |      |
| Qd-do3-02-B-2 | nodular carbonate | micrite matrix (mm)         | 93.2 | -15.89 | -11.06 |      |      |
| Qd-do3-02-B-1 | nodular carbonate | micrite matrix (mm)         | 93.2 | -26.56 | -4.37  |      |      |
| Qd-do3-02-A-2 | nodular carbonate | calcite cement (cc: b or w) | 93.2 | -23.74 | -5.62  |      |      |
| Qd-do3-02-A-1 | nodular carbonate | micrite matrix (mm)         | 93.2 | -29.58 | -6.22  | 0.10 | 91.1 |
| Qd-38d(mid)-B | nodular carbonate | micrite matrix (mm)         | 92.7 | -19.68 | -13.15 |      |      |
| Qd-38d(mid)-A | nodular carbonate | micrite matrix (mm)         | 92.7 | -22.28 | -10.44 |      |      |
| Qd-38d        | nodular carbonate | micrite matrix (mm)         | 92.7 | -19.44 | -9.51  |      |      |
| Qd-38d-5'     | nodular carbonate | micrite matrix (mm)         | 91.2 | -25.84 | -8.54  |      |      |
| Qd-do3-03-17  | nodular carbonate | micrite matrix (mm)         | 90.2 | -15.34 | -10.67 |      |      |
| Qd-do3-03-16  | nodular carbonate | black calcite (b)           | 90.2 | -29.34 | -2.90  |      |      |
| Qd-do3-03-15  | nodular carbonate | white calcite (w)           | 90.2 | -17.97 | -9.10  |      |      |
| Qd-do3-03-14  | nodular carbonate | white calcite (w)           | 90.2 | -17.99 | -7.30  |      |      |
| Qd-do3-03-13  | nodular carbonate | black calcite (b)           | 90.2 | -27.54 | -3.64  |      |      |
| Qd-do3-03-12  | nodular carbonate | white calcite (w)           | 90.2 | -15.72 | -9.73  |      |      |
| Qd-do3-03-11  | nodular carbonate | black calcite (b)           | 90.2 | -28.22 | -4.03  |      |      |
| Qd-do3-03-10  | nodular carbonate | white calcite (w)           | 90.2 | -16.01 | -8.79  |      |      |
| Qd-do3-03-9   | nodular carbonate | black calcite (b)           | 90.2 | -15.83 | -7.24  |      |      |

|                |                  |                      |                             |                     |        |        |        |      |      |
|----------------|------------------|----------------------|-----------------------------|---------------------|--------|--------|--------|------|------|
|                | Qd-do3-03-8      | nodular carbonate    | white calcite (w)           | 90.2                | -15.82 | -9.32  |        |      |      |
|                | Qd-do3-03-7      | nodular carbonate    | black calcite (b)           | 90.2                | -17.18 | -6.42  |        |      |      |
|                | Qd-do3-03-6      | nodular carbonate    | white calcite (w)           | 90.2                | -26.96 | -3.45  |        |      |      |
|                | Qd-do3-03-5      | nodular carbonate    | black calcite (b)           | 90.2                | -27.01 | -3.80  |        |      |      |
|                | Qd-do3-03-4      | nodular carbonate    | white calcite (w)           | 90.2                | -23.48 | -6.71  |        |      |      |
|                | Qd-do3-03-2      | nodular carbonate    | calcite cement (cc: b or w) | 90.2                | -21.42 | -5.48  |        |      |      |
|                | Qd-do3-03-1      | nodular carbonate    | micrite matrix (mm)         | 90.2                | -15.03 | -10.63 |        |      |      |
|                | Qd-38d(bottom)-B | nodular carbonate    | micrite matrix (mm)         | 90.2                | -26.13 | -8.91  |        |      |      |
|                | Qd-38d(bottom)-A | nodular carbonate    | calcite cement (cc: b or w) | 90.2                | -28.83 | -3.21  |        | 0.14 | 68.3 |
| QDS-1<br>(4 m) | Qd-d06-01-2      | carbonate concretion | micrite matrix (mm)         | 67.0                | -19.05 | -8.33  | -25.65 |      |      |
|                | Qd-d06-01-1      | carbonate concretion | micrite matrix (mm)         | 68.0                | -10.23 | -11.14 | -25.21 | 0.17 | 70.8 |
|                | Qd-d06-02-2      | carbonate concretion | micrite matrix (mm)         | 65.0                | -11.64 | -11.29 |        |      |      |
|                | Qd-d06-02-1      | carbonate concretion | micrite matrix (mm)         | 66.0                | -9.52  | -11.07 | -25.76 |      |      |
|                | Qd-d06-03-3      | carbonate concretion | micrite matrix (mm)         | 65.0                | -5.46  | -12.43 | -23.75 |      |      |
|                | Qd-d06-03-2      | carbonate concretion | micrite matrix (mm)         | 65.0                | -5.67  | -11.03 |        |      |      |
|                | Qd-d06-03-1      | carbonate concretion | micrite matrix (mm)         | 65.0                | -8.35  | -12.89 |        | 0.09 | 78.6 |
|                | Qd-36a-1         | carbonate concretion | micrite matrix (mm)         | 68.0                | -14.45 | -10.43 |        |      |      |
|                | Qd-36a-2         | carbonate concretion | micrite matrix (mm)         | 67.6                | -16.97 | -12.16 |        |      |      |
|                | Qd-36a-3         | carbonate concretion | micrite matrix (mm)         | 67.4                | -20.12 | -10.87 |        |      |      |
|                | Qd-36a-4         | carbonate concretion | micrite matrix (mm)         | 67.3                | -30.53 | -8.97  |        | 0.21 | 55.3 |
|                | Qd-36a-5(2)      | carbonate concretion | micrite matrix (mm)         | 66.9                | -26.07 | -10.48 |        |      |      |
|                | Qd-36a-5(1)      | carbonate concretion | micrite matrix (mm)         | 66.9                | -23.66 | -10.49 |        |      |      |
|                | Qd-36a-6(2)      | carbonate concretion | micrite matrix (mm)         | 66.0                | -7.08  | -11.18 |        |      |      |
|                | Qd-36a-6(1)      | carbonate concretion | micrite matrix (mm)         | 66.0                | -24.20 | -8.76  |        | 0.15 | 60.3 |
|                |                  | Qd-36a-7             | carbonate concretion        | micrite matrix (mm) | 65.6   | -13.81 | -12.48 |      |      |
|                | Qd-36a-8         | carbonate concretion | micrite matrix (mm)         | 65.0                | -19.26 | -14.02 |        |      |      |

|           |                      |                     |      |       |        |        |      |      |
|-----------|----------------------|---------------------|------|-------|--------|--------|------|------|
| Qd-36a-9  | carbonate concretion | micrite matrix (mm) | 63.5 | -5.04 | -13.18 |        |      |      |
| Qd-36a-10 | carbonate concretion | micrite matrix (mm) | 63.0 | -2.81 | -11.68 |        |      |      |
| Qd-36b-1  | carbonate concretion | micrite matrix (mm) | 62.0 | -0.32 | -9.47  |        |      |      |
| Qd-36b-2  | carbonate concretion | micrite matrix (mm) | 60.0 | -0.55 | -11.04 |        |      |      |
| Qd-36b-3  | carbonate concretion | micrite matrix (mm) | 58.0 | -4.58 | -5.44  |        |      |      |
| Qd-36b-4  | carbonate concretion | micrite matrix (mm) | 57.4 | -0.23 | -9.99  |        |      |      |
| Qd-36b-5  | carbonate concretion | micrite matrix (mm) | 56.0 | -1.21 | -9.77  |        | 0.17 | 91.2 |
| Qd-36b-6  | carbonate concretion | micrite matrix (mm) | 55.0 | -0.15 | -9.93  |        |      |      |
| Qd-36b-7  | carbonate concretion | micrite matrix (mm) | 51.0 | -2.91 | -10.94 |        |      |      |
| Qd-36b-8  | carbonate concretion | micrite matrix (mm) | 50.0 | -1.26 | -9.18  |        |      |      |
| Qd-36b-10 | carbonate concretion | micrite matrix (mm) | 48.0 | 0.31  | -9.70  |        | 0.23 | 51.5 |
| Qd-36b-11 | carbonate concretion | micrite matrix (mm) | 47.0 | 0.71  | -10.99 | -24.01 |      |      |
| Qd-36b-12 | carbonate concretion | micrite matrix (mm) | 46.0 | 0.15  | -11.85 | -24.17 |      |      |
| Qd-36b-13 | carbonate concretion | micrite matrix (mm) | 44.0 | 0.56  | -8.41  | -24.81 | 0.34 | 50.6 |
| Qd-36b-14 | carbonate concretion | micrite matrix (mm) | 42.0 | -0.58 | -9.83  |        |      |      |

**Table S3. Rare earth element + yttrium (REE+Y) concentration data of Qiangdong section samples (carbonate phase)**  
**[Whole rock and carbonate(carb-) fraction]**

| Sample No.<br>(carbonate<br>phase) | Whole<br>rock<br>(1) /<br>carb-fr<br>action<br>(0) | Th<br>(ppm) | Zr<br>(ppm) | Rb<br>(ppm) | REE+Y(ppm) |      |      |      |     |     |     |     |     |     |     |     |     |     |      |
|------------------------------------|----------------------------------------------------|-------------|-------------|-------------|------------|------|------|------|-----|-----|-----|-----|-----|-----|-----|-----|-----|-----|------|
|                                    |                                                    |             |             |             | La         | Ce   | Pr   | Nd   | Sm  | Eu  | Gd  | Tb  | Dy  | Ho  | Er  | Tm  | Yb  | Lu  | Y    |
| Q555                               | 1                                                  | 11.5        | 255.9       | 87.2        | 44.4       | 93.3 | 10.8 | 41.8 | 8.2 | 1.9 | 6.6 | 1.0 | 5.4 | 1.0 | 2.6 | 0.4 | 2.2 | 0.3 | 26.7 |
| Q554                               | 1                                                  | 11.5        | 258.1       | 85.2        | 45.1       | 95.4 | 11.0 | 43.6 | 8.4 | 2.1 | 6.8 | 1.1 | 5.6 | 1.0 | 2.7 | 0.4 | 2.3 | 0.3 | 27.2 |
| Q553                               | 1                                                  | 11.5        | 256.2       | 86.3        | 45.3       | 96.4 | 11.1 | 44.0 | 8.6 | 2.1 | 7.1 | 1.1 | 5.6 | 1.0 | 2.6 | 0.4 | 2.2 | 0.3 | 27.6 |
| Q552                               | 1                                                  | 11.1        | 251.1       | 83.3        | 43.6       | 91.0 | 10.6 | 40.8 | 8.1 | 2.0 | 6.5 | 1.0 | 5.4 | 1.0 | 2.5 | 0.4 | 2.3 | 0.3 | 26.5 |
| Qd-54-50-4                         | 1                                                  | 1.4         | 37.1        | 9.5         | 11.2       | 23.4 | 2.8  | 12.2 | 3.3 | 0.9 | 3.2 | 0.4 | 2.0 | 0.3 | 0.8 | 0.1 | 0.6 | 0.1 | 9.6  |
| Qd-54-50-3                         | 1                                                  | 1.7         | 39.3        | 8.8         | 11.9       | 25.3 | 2.9  | 12.9 | 3.4 | 1.0 | 3.2 | 0.4 | 2.3 | 0.4 | 0.9 | 0.1 | 0.8 | 0.1 | 10.4 |
| Q546                               | 1                                                  | 10.8        | 246.6       | 78.2        | 42.4       | 88.7 | 10.1 | 39.1 | 7.5 | 1.8 | 6.0 | 0.9 | 5.2 | 1.0 | 2.5 | 0.4 | 2.2 | 0.3 | 26.1 |
| Q544                               | 1                                                  | 10.6        | 234.3       | 78.8        | 42.9       | 91.8 | 10.7 | 43.5 | 8.9 | 2.2 | 7.6 | 1.1 | 5.8 | 1.0 | 2.5 | 0.4 | 2.2 | 0.3 | 28.2 |
| Q524                               | 1                                                  | 1.5         | 35.2        | 6.8         | 10.0       | 22.8 | 2.9  | 12.8 | 3.7 | 1.1 | 3.6 | 0.5 | 2.4 | 0.4 | 0.8 | 0.1 | 0.5 | 0.1 | 12.0 |
| Q523                               | 1                                                  | 2.0         | 45.8        | 12.9        | 12.3       | 28.4 | 3.4  | 15.3 | 4.2 | 0.9 | 4.2 | 0.6 | 2.8 | 0.4 | 1.0 | 0.1 | 0.7 | 0.1 | 13.6 |
| Q520                               | 1                                                  | 2.7         | 62.2        | 17.9        | 14.6       | 33.0 | 4.0  | 16.9 | 4.2 | 0.9 | 4.0 | 0.6 | 2.9 | 0.5 | 1.1 | 0.1 | 0.8 | 0.1 | 13.9 |
| Q518                               | 1                                                  | 2.5         | 58.3        | 17.1        | 15.1       | 35.4 | 4.3  | 18.3 | 4.5 | 1.4 | 4.5 | 0.6 | 3.2 | 0.5 | 1.2 | 0.2 | 0.8 | 0.1 | 14.7 |
| Q517                               | 1                                                  | 12.4        | 277.7       | 95.3        | 48.1       | 102  | 11.6 | 45.5 | 8.7 | 2.1 | 7.3 | 1.1 | 6.1 | 1.1 | 3.0 | 0.4 | 2.6 | 0.4 | 30.0 |
| Q515                               | 1                                                  | 11.2        | 257.4       | 88.9        | 43.8       | 92.4 | 10.5 | 41.8 | 8.1 | 2.0 | 6.8 | 1.0 | 5.6 | 1.0 | 2.7 | 0.4 | 2.3 | 0.3 | 26.7 |
| Q514                               | 1                                                  | 1.6         | 46.4        | 8.5         | 11.9       | 26.0 | 3.2  | 13.7 | 3.3 | 1.1 | 2.9 | 0.4 | 2.0 | 0.3 | 0.8 | 0.1 | 0.6 | 0.1 | 10.1 |
| Q510                               | 1                                                  | 1.7         | 42.7        | 9.1         | 12.6       | 29.6 | 3.6  | 16.4 | 4.5 | 1.3 | 3.9 | 0.5 | 2.4 | 0.4 | 0.9 | 0.1 | 0.8 | 0.1 | 11.3 |
| Qd-05-01                           | 1                                                  | 1.6         | 47.3        | 5.9         | 10.9       | 23.2 | 2.7  | 11.5 | 2.7 | 0.9 | 2.4 | 0.4 | 1.7 | 0.3 | 0.8 | 0.1 | 0.6 | 0.1 | 9.1  |
| Qd-05-01f                          | 1                                                  | 1.4         | 38.6        | 5.3         | 8.1        | 18.1 | 2.2  | 9.6  | 2.0 | 0.6 | 1.8 | 0.3 | 1.2 | 0.2 | 0.6 | 0.1 | 0.4 | 0.1 | 6.3  |



|                       |   |      |       |       |      |      |      |      |      |     |      |     |     |     |     |     |     |     |      |
|-----------------------|---|------|-------|-------|------|------|------|------|------|-----|------|-----|-----|-----|-----|-----|-----|-----|------|
| <b>Qd-04-01</b>       | 1 | 9.7  | 258.8 | 93.9  | 43.0 | 92.3 | 11.0 | 44.0 | 8.9  | 2.2 | 7.3  | 1.1 | 5.8 | 1.0 | 2.7 | 0.3 | 2.3 | 0.3 | 27.2 |
| <b>Q509</b>           | 1 | 1.6  | 44.8  | 6.1   | 10.4 | 23.7 | 2.9  | 12.6 | 3.1  | 1.0 | 2.8  | 0.4 | 1.9 | 0.3 | 0.7 | 0.1 | 0.6 | 0.1 | 9.0  |
| <b>Qd-06-01</b>       | 1 | 9.5  | 251.0 | 71.3  | 45.8 | 98.1 | 11.6 | 46.8 | 9.1  | 2.3 | 7.5  | 1.1 | 5.7 | 1.0 | 2.7 | 0.3 | 2.3 | 0.3 | 27.6 |
| <b>Qd-03-01</b>       | 1 | 8.5  | 237.4 | 87.7  | 38.9 | 83.1 | 9.3  | 36.4 | 7.3  | 1.9 | 6.1  | 1.0 | 4.9 | 0.9 | 2.4 | 0.3 | 2.0 | 0.3 | 24.5 |
| <b>Qd-02-01</b>       | 1 | 9.6  | 249.2 | 64.7  | 42.8 | 88.9 | 10.4 | 40.6 | 7.9  | 2.0 | 6.6  | 1.0 | 5.4 | 1.0 | 2.7 | 0.4 | 2.3 | 0.3 | 27.1 |
| <b>Q507</b>           | 1 | 10.7 | 281.1 | 102.8 | 41.8 | 89.8 | 10.2 | 39.5 | 7.3  | 1.8 | 6.0  | 0.9 | 5.4 | 1.0 | 2.6 | 0.4 | 2.2 | 0.3 | 25.5 |
| <b>Qd-01-02</b>       | 1 | 11.0 | 266.0 | 94.1  | 45.2 | 95.5 | 11.1 | 43.9 | 8.8  | 2.2 | 7.2  | 1.2 | 6.1 | 1.1 | 2.9 | 0.4 | 2.5 | 0.4 | 29.5 |
| <b>Qd-07-01A</b>      | 1 | 10.7 | 284.9 | 96.6  | 45.1 | 98.4 | 11.2 | 44.9 | 8.8  | 2.2 | 7.0  | 1.1 | 5.7 | 1.1 | 2.8 | 0.4 | 2.2 | 0.3 | 26.7 |
| <b>Qd-07-01B</b>      | 1 | 10.8 | 293.9 | 96.5  | 44.1 | 94.6 | 10.6 | 41.5 | 7.6  | 2.0 | 6.2  | 1.0 | 5.5 | 1.0 | 2.7 | 0.4 | 2.3 | 0.3 | 26.3 |
| <b>Qd-01-01</b>       | 1 | 11.3 | 257.8 | 93.8  | 45.3 | 94.1 | 11.0 | 43.3 | 8.4  | 2.0 | 6.9  | 1.1 | 5.8 | 1.1 | 2.8 | 0.4 | 2.4 | 0.3 | 28.8 |
| <b>Q505</b>           | 1 | 10.6 | 297.3 | 99.8  | 46.2 | 99.5 | 11.2 | 43.1 | 7.8  | 2.0 | 6.6  | 1.0 | 5.5 | 1.0 | 2.6 | 0.4 | 2.3 | 0.3 | 26.7 |
| <b>Qd-08-01</b>       | 1 | 9.4  | 252.8 | 85.8  | 39.4 | 84.7 | 9.7  | 38.3 | 7.7  | 1.9 | 6.1  | 0.9 | 5.0 | 0.9 | 2.5 | 0.3 | 2.1 | 0.3 | 24.5 |
| <b>Q503</b>           | 1 | 9.2  | 265.6 | 91.5  | 40.4 | 86.5 | 9.9  | 39.0 | 7.4  | 1.8 | 6.0  | 0.9 | 4.9 | 0.9 | 2.4 | 0.3 | 2.1 | 0.3 | 24.2 |
| <b>Q501</b>           | 1 | 12.0 | 370.4 | 131.6 | 52.4 | 112  | 12.6 | 50.2 | 9.2  | 2.2 | 7.3  | 1.1 | 6.3 | 1.1 | 3.0 | 0.4 | 2.6 | 0.4 | 29.5 |
| <b>Qd-09-01</b>       | 1 | 9.6  | 263.1 | 89.6  | 44.3 | 96.5 | 11.4 | 47.0 | 9.8  | 2.4 | 7.7  | 1.1 | 5.6 | 1.0 | 2.6 | 0.4 | 2.1 | 0.3 | 26.9 |
| <b>Q499</b>           | 1 | 8.3  | 249.4 | 83.1  | 37.1 | 79.7 | 9.3  | 37.1 | 7.3  | 1.9 | 6.0  | 0.9 | 5.0 | 0.9 | 2.4 | 0.3 | 2.0 | 0.3 | 23.7 |
| <b>Qd-10-01</b>       | 1 | 8.5  | 251.0 | 72.6  | 42.1 | 99.0 | 12.9 | 56.5 | 12.8 | 3.3 | 10.7 | 1.4 | 6.9 | 1.1 | 2.8 | 0.3 | 2.1 | 0.3 | 30.2 |
| <b>Q493</b>           | 1 | 8.1  | 237.1 | 72.7  | 37.3 | 79.2 | 9.2  | 37.1 | 7.2  | 1.8 | 5.6  | 0.9 | 4.8 | 0.9 | 2.3 | 0.3 | 1.9 | 0.3 | 22.9 |
| <b>Qd-11-01</b>       | 1 | 7.5  | 228.6 | 65.1  | 34.5 | 73.0 | 8.6  | 34.4 | 7.0  | 1.8 | 5.7  | 0.9 | 4.5 | 0.9 | 2.3 | 0.3 | 1.9 | 0.3 | 23.0 |
| <b>Q491</b>           | 1 | 9.5  | 260.8 | 90.9  | 48.6 | 111  | 14.0 | 61.3 | 13.3 | 3.4 | 10.9 | 1.4 | 6.8 | 1.2 | 2.7 | 0.4 | 2.3 | 0.3 | 31.6 |
| <b>Qd-12-01</b>       | 1 | 10.8 | 312.8 | 116.9 | 47.5 | 101  | 11.5 | 45.6 | 8.4  | 2.1 | 6.6  | 1.1 | 5.9 | 1.1 | 2.8 | 0.4 | 2.4 | 0.3 | 28.1 |
| <b>Qd-13-01</b>       | 1 | 3.2  | 98.2  | 30.9  | 15.9 | 34.3 | 4.1  | 16.5 | 3.2  | 0.9 | 2.9  | 0.4 | 2.2 | 0.4 | 1.0 | 0.1 | 0.9 | 0.1 | 11.3 |
| <b>Qd-14-01</b>       | 1 | 2.1  | 56.7  | 15.6  | 13.8 | 32.0 | 3.6  | 14.9 | 3.5  | 1.0 | 3.2  | 0.4 | 2.3 | 0.4 | 1.0 | 0.2 | 0.8 | 0.1 | 10.6 |
| <b>Qd-14-01pyrite</b> | 1 | 7.4  | 238.2 | 73.7  | 36.6 | 80.4 | 9.4  | 37.9 | 7.7  | 2.0 | 6.2  | 0.9 | 4.7 | 0.9 | 2.2 | 0.3 | 1.9 | 0.3 | 22.8 |
| <b>qD-52+37b-ii</b>   | 1 | 1.6  | 46.0  | 9.5   | 11.5 | 25.6 | 3.2  | 15.0 | 4.1  | 1.4 | 3.5  | 0.5 | 2.1 | 0.3 | 0.8 | 0.1 | 0.6 | 0.1 | 9.4  |
| <b>Qd-15-02</b>       | 1 | 9.6  | 274.8 | 8.7   | 38.6 | 80.1 | 8.8  | 33.6 | 6.1  | 1.5 | 5.1  | 0.8 | 4.5 | 0.8 | 2.4 | 0.3 | 2.0 | 0.3 | 22.8 |

|                   |   |      |       |       |      |      |      |      |      |     |     |     |     |     |     |     |     |     |      |
|-------------------|---|------|-------|-------|------|------|------|------|------|-----|-----|-----|-----|-----|-----|-----|-----|-----|------|
| <b>Qd-15-01f</b>  | 1 | 1.6  | 48.0  | 92.8  | 10.8 | 25.5 | 3.2  | 14.6 | 4.1  | 1.4 | 3.5 | 0.4 | 2.0 | 0.3 | 0.8 | 0.1 | 0.5 | 0.1 | 9.2  |
| <b>Q457</b>       | 1 | 9.8  | 283.5 | 100.9 | 42.8 | 91.3 | 10.8 | 42.1 | 8.0  | 2.1 | 6.4 | 1.0 | 5.4 | 1.0 | 2.5 | 0.4 | 2.1 | 0.3 | 26.3 |
| <b>Q456</b>       | 1 | 8.5  | 247.6 | 75.3  | 44.1 | 94.1 | 12.0 | 50.8 | 10.5 | 3.0 | 8.7 | 1.2 | 5.9 | 1.0 | 2.6 | 0.3 | 2.1 | 0.3 | 28.8 |
| <b>Q458</b>       | 1 | 11.2 | 354.4 | 118.7 | 45.5 | 92.9 | 10.4 | 38.9 | 6.7  | 1.7 | 5.5 | 0.9 | 5.3 | 1.0 | 2.7 | 0.4 | 2.4 | 0.4 | 27.6 |
| <b>Q454</b>       | 1 | 8.5  | 361.4 | 45.0  | 44.1 | 84.0 | 11.1 | 44.7 | 8.3  | 2.3 | 6.4 | 0.9 | 4.7 | 0.8 | 2.2 | 0.3 | 1.8 | 0.3 | 24.2 |
| <b>Q452</b>       | 1 | 8.0  | 386.7 | 31.7  | 40.4 | 77.1 | 9.9  | 39.8 | 7.1  | 2.0 | 5.7 | 0.8 | 4.3 | 0.8 | 2.1 | 0.3 | 1.9 | 0.3 | 23.4 |
| <b>Qd-49-5</b>    | 1 | 6.9  | 335.9 | 34.9  | 40.8 | 79.9 | 10.2 | 42.4 | 8.2  | 2.2 | 6.1 | 0.9 | 4.6 | 0.8 | 2.1 | 0.3 | 1.9 | 0.3 | 24.6 |
| <b>Qd-48-1</b>    | 1 | 5.2  | 204.7 | 39.2  | 33.9 | 62.0 | 8.1  | 33.2 | 6.1  | 1.7 | 4.7 | 0.6 | 3.3 | 0.6 | 1.5 | 0.2 | 1.3 | 0.2 | 17.5 |
| <b>Qd-44-b-2</b>  | 1 | 11.5 | 362.6 | 114.9 | 54.3 | 114  | 12.9 | 52.1 | 9.8  | 2.3 | 7.5 | 1.0 | 5.6 | 1.0 | 2.6 | 0.4 | 2.3 | 0.3 | 27.0 |
| <b>Qd-44+29.4</b> | 1 | 1.5  | 47.3  | 10.7  | 11.3 | 22.5 | 2.7  | 11.4 | 2.6  | 0.9 | 2.1 | 0.3 | 1.4 | 0.2 | 0.7 | 0.1 | 0.5 | 0.1 | 7.8  |
| <b>Qd-39+132</b>  | 1 | 5.8  | 216.3 | 38.1  | 35.1 | 76.0 | 8.6  | 36.8 | 8.2  | 2.4 | 6.3 | 0.8 | 4.0 | 0.7 | 1.7 | 0.2 | 1.4 | 0.2 | 19.1 |
| <b>Qd-43-5.2</b>  | 1 | 3.5  | 74.2  | 33.4  | 18.4 | 31.5 | 4.3  | 17.9 | 3.5  | 0.9 | 3.1 | 0.4 | 2.4 | 0.5 | 1.2 | 0.2 | 1.0 | 0.1 | 14.6 |
| <b>Qd-43-2(1)</b> | 1 | 1.9  | 62.2  | 13.5  | 11.2 | 22.2 | 2.6  | 10.4 | 1.8  | 0.5 | 1.5 | 0.2 | 1.1 | 0.2 | 0.5 | 0.1 | 0.5 | 0.1 | 5.6  |
| <b>Qd-43-2(3)</b> | 1 | 1.7  | 56.4  | 10.7  | 13.1 | 25.5 | 3.1  | 12.4 | 2.6  | 0.7 | 1.9 | 0.3 | 1.3 | 0.2 | 0.7 | 0.1 | 0.5 | 0.1 | 7.0  |
| <b>Qd-43a+2-1</b> | 1 | 2.7  | 67.2  | 27.6  | 16.1 | 27.7 | 3.7  | 15.6 | 3.2  | 0.9 | 2.8 | 0.4 | 2.1 | 0.4 | 1.0 | 0.1 | 0.8 | 0.1 | 12.8 |
| <b>Qd-d03-01B</b> | 1 | 2.4  | 63.4  | 13.2  | 13.8 | 29.9 | 3.3  | 13.0 | 2.6  | 0.8 | 2.1 | 0.3 | 1.4 | 0.3 | 0.6 | 0.1 | 0.5 | 0.1 | 7.7  |
| <b>Qd-d03-01A</b> | 1 | 1.5  | 34.4  | 8.0   | 9.6  | 19.6 | 2.1  | 8.2  | 1.6  | 0.4 | 1.1 | 0.2 | 0.9 | 0.2 | 0.4 | 0.1 | 0.3 | 0.0 | 4.7  |
| <b>Qd-d01-02</b>  | 1 | 14.9 | 497.7 | 130.3 | 72.5 | 152  | 17.2 | 65.5 | 11.9 | 2.7 | 8.5 | 1.2 | 6.5 | 1.2 | 3.0 | 0.4 | 2.4 | 0.4 | 31.2 |
| <b>Qd-d02-02</b>  | 1 | 16.8 | 552.5 | 135.3 | 83.1 | 198  | 19.8 | 75.9 | 13.5 | 3.0 | 9.9 | 1.5 | 7.8 | 1.4 | 3.5 | 0.5 | 3.0 | 0.4 | 36.8 |
| <b>Qd-d06-01A</b> | 1 | 8.4  | 223.3 | 75.7  | 39.7 | 87.1 | 10.4 | 42.8 | 9.1  | 2.4 | 7.5 | 1.1 | 5.4 | 1.0 | 2.4 | 0.3 | 2.0 | 0.3 | 25.8 |
| <b>Qd-d04-01</b>  | 1 | 12.1 | 89.7  | 3.7   | 55.7 | 121  | 13.8 | 55.2 | 11.3 | 2.8 | 8.9 | 1.2 | 6.4 | 1.1 | 2.8 | 0.4 | 2.4 | 0.4 | 31.0 |
| <b>Qd-d06-01B</b> | 1 | 2.2  | 94.0  | 3.8   | 13.8 | 28.4 | 3.3  | 13.6 | 3.1  | 1.0 | 2.8 | 0.4 | 2.4 | 0.4 | 1.0 | 0.1 | 0.8 | 0.1 | 12.6 |
| <b>Qd-d06-02</b>  | 1 | 2.2  | 378.2 | 110.6 | 14.2 | 29.8 | 3.5  | 14.6 | 3.4  | 1.1 | 3.1 | 0.5 | 2.5 | 0.4 | 1.1 | 0.1 | 0.9 | 0.1 | 13.1 |
| <b>Qd-d05-01</b>  | 1 | 15.0 | 93.9  | 3.3   | 65.4 | 135  | 15.6 | 60.1 | 11.1 | 2.6 | 8.9 | 1.3 | 6.8 | 1.2 | 3.2 | 0.5 | 2.7 | 0.4 | 35.3 |
| <b>Qd-d06-03</b>  | 1 | 2.2  | 470.0 | 98.0  | 14.2 | 29.2 | 3.4  | 14.1 | 3.2  | 1.1 | 2.9 | 0.4 | 2.3 | 0.4 | 1.0 | 0.1 | 0.8 | 0.1 | 13.4 |
| <b>Qd-d08-01</b>  | 1 | 13.0 | 466.4 | 85.6  | 62.7 | 133  | 15.3 | 59.5 | 11.0 | 2.7 | 8.7 | 1.3 | 7.2 | 1.3 | 3.3 | 0.5 | 2.8 | 0.4 | 33.8 |

|                              |   |      |       |       |      |      |      |      |      |     |     |     |     |     |     |     |     |     |      |
|------------------------------|---|------|-------|-------|------|------|------|------|------|-----|-----|-----|-----|-----|-----|-----|-----|-----|------|
| <b>Qd-d09-01</b>             | 1 | 15.0 | 485.2 | 76.8  | 69.6 | 148  | 17.0 | 66.6 | 12.5 | 2.8 | 9.8 | 1.5 | 7.9 | 1.4 | 3.6 | 0.5 | 2.9 | 0.4 | 37.1 |
| <b>Qd-d07-01</b>             | 1 | 10.5 | 363.9 | 104.5 | 50.8 | 109  | 12.7 | 50.9 | 10.5 | 2.8 | 8.5 | 1.3 | 6.7 | 1.2 | 3.0 | 0.4 | 2.6 | 0.4 | 32.4 |
| <b>Qd-d11-02</b>             | 1 | 3.9  | 125.5 | 21.5  | 29.7 | 59.3 | 6.9  | 27.6 | 5.6  | 1.7 | 4.3 | 0.6 | 3.3 | 0.6 | 1.4 | 0.2 | 1.1 | 0.2 | 18.1 |
| <b>Qd-d10-01</b>             | 1 | 11.6 | 348.5 | 87.4  | 54.3 | 114  | 13.4 | 52.5 | 10.0 | 2.6 | 8.1 | 1.2 | 6.3 | 1.1 | 2.9 | 0.4 | 2.4 | 0.3 | 31.1 |
| <b>Qd-d11-01</b>             | 1 | 12.1 | 381.9 | 81.0  | 58.8 | 121  | 14.2 | 55.2 | 10.2 | 2.5 | 7.9 | 1.2 | 6.6 | 1.1 | 3.2 | 0.4 | 2.5 | 0.3 | 32.6 |
| <b>Qd-d12-01</b>             | 1 | 13.0 | 394.9 | 84.0  | 64.7 | 133  | 15.7 | 61.3 | 11.4 | 3.0 | 9.3 | 1.3 | 7.1 | 1.2 | 3.1 | 0.5 | 2.8 | 0.4 | 35.5 |
| <b>Qd-G36-103B</b>           | 1 | 1.5  | 58.2  | 2.6   | 10.8 | 23.1 | 2.6  | 10.6 | 2.2  | 0.6 | 1.9 | 0.3 | 1.3 | 0.2 | 0.5 | 0.1 | 0.5 | 0.1 | 6.8  |
| <b>Qd-G36-106B</b>           | 1 | 1.7  | 61.4  | 2.8   | 12.2 | 25.5 | 2.9  | 11.9 | 2.5  | 0.7 | 2.0 | 0.3 | 1.4 | 0.3 | 0.6 | 0.1 | 0.5 | 0.1 | 7.4  |
| <b>Qd-54-49 (mm)</b>         | 0 | 3.4  | 0.1   | 2.7   | 5.0  | 16.2 | 2.6  | 14.6 | 4.8  | 1.2 | 4.5 | 0.5 | 2.3 | 0.3 | 0.6 | 0.1 | 0.3 | 0.0 | 8.4  |
| <b>Qd-09-01 (mm)</b>         | 0 | 3.6  | 0.4   | 2.8   | 6.3  | 23.4 | 3.9  | 22.2 | 7.4  | 1.9 | 6.0 | 0.7 | 2.7 | 0.4 | 0.7 | 0.1 | 0.4 | 0.0 | 10.0 |
| <b>Qd-49-15 (mm)</b>         | 0 | 1.7  | 8.4   | 1.1   | 20.1 | 43.6 | 5.9  | 27.0 | 5.8  | 1.6 | 4.2 | 0.5 | 2.6 | 0.4 | 1.0 | 0.1 | 0.7 | 0.1 | 12.8 |
| <b>Qd-46-2 (mm)</b>          | 0 | 1.4  | 2.8   | 1.2   | 15.5 | 27.2 | 4.8  | 20.9 | 3.9  | 1.0 | 2.7 | 0.3 | 1.5 | 0.2 | 0.6 | 0.1 | 0.3 | 0.0 | 5.9  |
| <b>Qd-44-29-ii<br/>(mm)</b>  | 0 | 5.2  | 118.6 | 46.2  | 27.8 | 57.0 | 7.0  | 29.1 | 6.3  | 1.8 | 5.0 | 0.7 | 3.6 | 0.7 | 1.6 | 0.2 | 1.4 | 0.2 | 18.3 |
| <b>QD-G36-0M-1<br/>(mm)</b>  | 0 | 0.1  | 0.9   | 0.6   | 3.7  | 7.7  | 0.9  | 4.1  | 1.3  | 0.5 | 1.3 | 0.2 | 0.7 | 0.1 | 0.3 | 0.0 | 0.2 | 0.0 | 3.7  |
| <b>QD-G38d-3<br/>(mm)</b>    | 0 | 0.9  | 2.2   | 0.8   | 4.8  | 12.0 | 1.4  | 6.0  | 1.5  | 0.5 | 1.3 | 0.2 | 0.7 | 0.1 | 0.3 | 0.0 | 0.2 | 0.0 | 3.4  |
| <b>QD-G38d-lzhy<br/>(mm)</b> | 0 | 0.8  | 2.1   | 0.7   | 5.9  | 13.5 | 1.5  | 6.7  | 1.5  | 0.5 | 1.2 | 0.2 | 0.8 | 0.1 | 0.3 | 0.0 | 0.2 | 0.0 | 4.1  |
| <b>QD-G53D+2<br/>(mm)</b>    | 0 | 0.6  | 1.0   | 0.7   | 3.5  | 8.6  | 1.2  | 5.6  | 1.8  | 0.6 | 1.6 | 0.2 | 0.9 | 0.1 | 0.3 | 0.0 | 0.2 | 0.0 | 4.1  |
| <b>QD-G52+37b-1<br/>(mm)</b> | 0 | 0.6  | 1.4   | 0.6   | 4.1  | 11.6 | 1.6  | 8.0  | 2.9  | 1.0 | 2.3 | 0.3 | 1.3 | 0.2 | 0.4 | 0.0 | 0.3 | 0.0 | 5.3  |
| <b>QD-G36-3B<br/>(mm)</b>    | 0 | 0.5  | 0.2   | 0.3   | 3.5  | 8.8  | 1.2  | 5.7  | 2.0  | 0.8 | 2.0 | 0.3 | 1.6 | 0.3 | 0.6 | 0.1 | 0.5 | 0.1 | 8.9  |

|                       |   |     |     |     |     |      |     |      |     |     |     |     |     |     |     |     |     |     |     |
|-----------------------|---|-----|-----|-----|-----|------|-----|------|-----|-----|-----|-----|-----|-----|-----|-----|-----|-----|-----|
| <b>QD-G54d-lzhy</b>   | 0 | 0.5 | 0.8 | 0.6 | 4.5 | 10.2 | 1.2 | 5.6  | 1.8 | 0.7 | 1.6 | 0.2 | 1.0 | 0.2 | 0.4 | 0.0 | 0.3 | 0.0 | 5.0 |
| <b>(mm)</b>           |   |     |     |     |     |      |     |      |     |     |     |     |     |     |     |     |     |     |     |
| <b>QD-G38d+14m</b>    | 0 | 0.2 | 3.6 | 1.5 | 5.9 | 14.3 | 1.7 | 8.0  | 2.5 | 0.9 | 2.2 | 0.2 | 0.8 | 0.1 | 0.3 | 0.0 | 0.2 | 0.0 | 3.7 |
| <b>(mm)</b>           |   |     |     |     |     |      |     |      |     |     |     |     |     |     |     |     |     |     |     |
| <b>QD-G52+165b-I</b>  | 0 | 0.8 | 0.3 | 1.1 | 4.9 | 13.6 | 1.7 | 8.2  | 2.7 | 0.8 | 2.3 | 0.3 | 1.4 | 0.2 | 0.4 | 0.1 | 0.3 | 0.0 | 5.8 |
| <b>(mm)</b>           |   |     |     |     |     |      |     |      |     |     |     |     |     |     |     |     |     |     |     |
| <b>QD-G44-29.4-2</b>  | 0 | 0.7 | 0.9 | 0.5 | 6.0 | 14.4 | 1.8 | 8.2  | 2.1 | 0.9 | 1.5 | 0.2 | 0.8 | 0.1 | 0.3 | 0.0 | 0.3 | 0.0 | 4.4 |
| <b>(mm)</b>           |   |     |     |     |     |      |     |      |     |     |     |     |     |     |     |     |     |     |     |
| <b>Qd-d03-03 (b)</b>  | 0 | 0.0 | 0.2 | 0.0 | 0.4 | 1.2  | 0.2 | 0.8  | 0.2 | 0.1 | 0.2 | 0.0 | 0.1 | 0.0 | 0.0 | 0.0 | 0.0 | 0.0 | 0.4 |
| <b>Qd-d03-03 (mm)</b> | 0 | 1.3 | 0.8 | 0.0 | 4.7 | 13.2 | 1.6 | 7.2  | 1.6 | 0.4 | 1.3 | 0.2 | 0.7 | 0.1 | 0.2 | 0.0 | 0.2 | 0.0 | 3.4 |
| <b>Qd-42 (sp)</b>     | 0 | 0.0 | 0.0 | 0.6 | 0.6 | 1.7  | 0.2 | 0.8  | 0.2 | 0.1 | 0.2 | 0.0 | 0.1 | 0.0 | 0.1 | 0.0 | 0.0 | 0.0 | 0.8 |
| <b>Qd-42 (b)</b>      | 0 | 0.0 | 0.2 | 0.1 | 0.6 | 1.9  | 0.2 | 0.9  | 0.2 | 0.1 | 0.2 | 0.0 | 0.1 | 0.0 | 0.0 | 0.0 | 0.0 | 0.0 | 0.6 |
| <b>Qd-42 (mm)</b>     | 0 | 1.2 | 0.2 | 0.0 | 3.3 | 10.3 | 1.4 | 6.1  | 1.2 | 0.3 | 0.8 | 0.1 | 0.4 | 0.1 | 0.1 | 0.0 | 0.1 | 0.0 | 1.5 |
| <b>Qd-38 (w)</b>      | 0 | 0.0 | 0.0 | 0.5 | 0.9 | 2.7  | 0.4 | 1.8  | 0.4 | 0.2 | 0.4 | 0.0 | 0.2 | 0.0 | 0.1 | 0.0 | 0.1 | 0.0 | 1.3 |
| <b>Qd-38 (b)</b>      | 0 | 0.0 | 0.6 | 0.1 | 0.4 | 1.1  | 0.1 | 0.6  | 0.1 | 0.1 | 0.1 | 0.0 | 0.1 | 0.0 | 0.0 | 0.0 | 0.0 | 0.0 | 0.4 |
| <b>Qd-38 (mm)</b>     | 0 | 0.9 | 1.9 | 0.0 | 9.2 | 22.5 | 2.7 | 11.6 | 2.8 | 0.7 | 2.4 | 0.3 | 1.3 | 0.2 | 0.5 | 0.1 | 0.3 | 0.0 | 6.8 |
| <b>Qd-05-01 (sp)</b>  | 0 | 0.0 | 0.0 | 0.8 | 0.6 | 2.2  | 0.5 | 3.0  | 1.6 | 0.6 | 1.5 | 0.2 | 0.8 | 0.1 | 0.2 | 0.0 | 0.1 | 0.0 | 3.9 |
| <b>Qd-05-01 (b)</b>   | 0 | 0.3 | 0.1 | 0.6 | 2.8 | 7.7  | 1.0 | 4.9  | 1.5 | 0.4 | 1.4 | 0.2 | 0.8 | 0.1 | 0.3 | 0.0 | 0.2 | 0.0 | 4.1 |
| <b>Qd-05-01 (mm)</b>  | 0 | 1.2 | 0.3 | 0.4 | 5.2 | 14.3 | 1.9 | 9.3  | 2.5 | 0.7 | 2.0 | 0.2 | 1.0 | 0.2 | 0.3 | 0.0 | 0.3 | 0.0 | 4.7 |

**Table S4. The isotope data ( $\delta^{13}\text{C}$ ,  $\delta^{18}\text{O}$ ,  $\Delta_{47}$ ) of MDCs <sup>†</sup>**

| Sample ID   | Horizon | Carbonate phase | $\delta^{13}\text{C}$ (VPDB, ‰) | $\delta^{18}\text{O}$ (VPDB, ‰) | $\Delta_{47}$ (‰, $\pm 1$ s.e.) <sup>*</sup> | n | $T_{\Delta 47}$ ( $^{\circ}\text{C}$ , $\pm 1$ s.e.) |
|-------------|---------|-----------------|---------------------------------|---------------------------------|----------------------------------------------|---|------------------------------------------------------|
| QD-G36-0m-1 | QDS-1   | <i>mm</i>       | -29.74                          | -8.41                           | 0.476                                        | 1 | 146                                                  |
| QD-G36-3B   | QDS-1   | <i>mm</i>       | -17.62                          | -11.91                          | 0.402                                        | 1 | 243                                                  |
| QD-G36-6B   | QDS-1   | <i>mm</i>       | -5.59                           | -12.15                          | 0.450 $\pm$ 0.017                            | 3 | 174 $\pm$ 18                                         |
| QD-G36-8B   | QDS-1   | <i>mm</i>       | -0.04                           | -9.19                           | 0.406 $\pm$ 0.004                            | 2 | 236 $\pm$ 7                                          |
| QD-G36-11B  | QDS-1   | <i>mm</i>       | 7.98                            | -0.82                           | 0.618 $\pm$ 0.018                            | 3 | 53 $\pm$ 8                                           |
| QD-G36-23B  | QDS-1   | <i>mm</i>       | 3.04                            | -4.20                           | 0.552 $\pm$ 0.001                            | 2 | 88 $\pm$ 1                                           |
| QD-G36-28B  | QDS-1   | <i>mm</i>       | 0.02                            | -6.49                           | 0.500 $\pm$ 0.002                            | 2 | 125 $\pm$ 2                                          |
| QD-G36-40B  | QDS-1   | <i>mm</i>       | -2.38                           | -10.09                          | 0.416 $\pm$ 0.001                            | 2 | 219 $\pm$ 1                                          |
| QD-G36-169  | QDS-1   | <i>mm</i>       | -4.82                           | -5.30                           | 0.624 $\pm$ 0.006                            | 2 | 50 $\pm$ 3                                           |
| QD-G38d+14m | QDS-2   | <i>mm</i>       | -14.38                          | -9.70                           | 0.439 $\pm$ 0.003                            | 2 | 187 $\pm$ 3                                          |
| QD-G38d-3   | QDS-2   | <i>mm</i>       | -27.92                          | -8.23                           | 0.360 $\pm$ 0.020                            | 2 | 340 $\pm$ 54                                         |
| QD-G39d-4m  | QDS-3   | <i>mm</i>       | -13.05                          | -9.44                           | 0.365 $\pm$ 0.006                            | 2 | 325 $\pm$ 15                                         |
| QD-G39d-6m  | QDS-3   | <i>mm</i>       | -12.11                          | -9.63                           | 0.386 $\pm$ 0.001                            | 2 | 275 $\pm$ 3                                          |
| QD-G43a+0.8 | QDS-4   | <i>mm</i>       | -2.10                           | -9.47                           | 0.437 $\pm$ 0.005                            | 2 | 190 $\pm$ 6                                          |
| QD-G44+29.4 | QDS-4   | <i>mm</i>       | -11.69                          | -6.84                           | 0.332 $\pm$ 0.009                            | 3 | 444 $\pm$ 40                                         |
| QD-42       | QDS-4   | <i>sp</i>       | -0.12                           | -14.13                          | 0.438 $\pm$ 0.002                            | 3 | 188 $\pm$ 5                                          |
| QD-G52+165  | QDS-7   | <i>mm</i>       | -14.24                          | -8.05                           | 0.481 $\pm$ 0.010                            | 2 | 141 $\pm$ 9                                          |
| QD-G53D+2   | QDS-7   | <i>mm</i>       | -22.62                          | -5.33                           | 0.374 $\pm$ 0.010                            | 2 | 301 $\pm$ 24                                         |
| QD-05-01    | QDS-7   | <i>sp</i>       | -5.68                           | -11.85                          | 0.513 $\pm$ 0.004                            | 3 | 114 $\pm$ 5                                          |

<sup>†</sup> $\Delta_{47}$  values based on Brand parameters (Chang et al., 2019) and derived  $T_{\Delta 47}$  values based on corrected  $\Delta_{47}$  using the temperature calibration of Petersen et al. (2019).

<sup>\*</sup>Standard error (s.e.) was given as 1 s.d./( $n^{0.5}$ ). Standard deviation (s.d.) was derived from duplicate analyses.

## References

- Petersen, S. V., Defliese, W. F., Saenger, C., Daëron, M., Huntington, K. W., John, C. M., Kelson, J. R., Bernasconi, S. M., Colman, A. S., Kluge, T., Olack, G. A., Schauer, A. J., Bajnai, D., Bonifacie, M., Breitenbach, S. F. M., Fiebig, J., Fernandez, A. B., Henkes, G. A., Hodell, D., Katz, A., Kele, S., Lohmann, K. C., Passey, B. H., Peral, M. Y., Petrizzo, D. A., Rosenheim, B. E., Tripathi, A., Venturelli, R., Young, E. D., and Winkelstern, I. Z., 2019, Effects of Improved <sup>17</sup>O Correction on Interlaboratory Agreement in Clumped Isotope Calibrations, Estimates of Mineral - Specific Offsets, and Temperature Dependence of Acid Digestion Fractionation: *Geochemistry, Geophysics, Geosystems*, v. 20, p. 1-25.
- Chang, B., Defliese, W.F., Li, C., Huang, J., Tripathi, A., Algeo, T.J., 2019. Effects of different constants and standards on the reproducibility of carbonate clumped isotope ( $\Delta_{47}$ ) measurements: Insights from a long-term dataset. *Rapid Communications in Mass Spectrometry*, v. 34, no. 8, p. 8678.
